# Supplementary material for: Conserved Secondary Structures in Viral mRNAs
Source: MDPI journal article supplement (doi:10.3390/v11050401), 2019-04-29
Supplement: s1 [file s1]

Table S1: Structural coverage of subVOG mRNAs associated with GO terms. The GO terms are clustered into functionally similar groups using Revigo. Only manually and experimentally annotated GO terms are shown. A color coded version of the table is provided online at [http://subvogs.bio.wzw.tum.de/sup/table\\_s1.html](http://subvogs.bio.wzw.tum.de/sup/table_s1.html).

| GO term    | Ontology           | Description                                            | Revigo cluster | Mean structural coverage | Number of subVOGs | Number of proteins |
|------------|--------------------|--------------------------------------------------------|----------------|--------------------------|-------------------|--------------------|
| GO:0006139 | biological process | nucleobase-containing compound metabolic process       | 1              | 0.1410                   | 1                 | 2                  |
| GO:0006259 | biological process | DNA metabolic process                                  | 2              | 0.1410                   | 1                 | 2                  |
| GO:0006278 | biological process | RNA-dependent DNA biosynthetic process                 | 3              | 0.1410                   | 1                 | 2                  |
| GO:0006725 | biological process | cellular aromatic compound metabolic process           | 4              | 0.1410                   | 1                 | 2                  |
| GO:0006807 | biological process | nitrogen compound metabolic process                    | 5              | 0.1410                   | 1                 | 2                  |
| GO:0008150 | biological process | biological process                                     | 6              | 0.0689                   | 10                | 59                 |
| GO:0008152 | biological process | metabolic process                                      | 7              | 0.1410                   | 1                 | 2                  |
| GO:0009058 | biological process | biosynthetic process                                   | 8              | 0.1410                   | 1                 | 2                  |
| GO:0009059 | biological process | macromolecule biosynthetic process                     | 9              | 0.1410                   | 1                 | 2                  |
| GO:0009894 | biological process | regulation of catabolic process                        | 10             | 0.1130                   | 4                 | 12                 |
| GO:0009987 | biological process | cellular process                                       | 11             | 0.1410                   | 1                 | 2                  |
| GO:0010506 | biological process | regulation of autophagy                                | 12             | 0.1130                   | 4                 | 12                 |
| GO:0010508 | biological process | positive regulation of autophagy                       | 12             | 0.1130                   | 4                 | 12                 |
| GO:0010605 | biological process | negative regulation of macromolecule metabolic process | 13             | 0.1130                   | 4                 | 12                 |
| GO:0009892 | biological process | negative regulation of metabolic process               | 13             | 0.1130                   | 4                 | 12                 |
| GO:0010629 | biological process | negative regulation of gene expression                 | 13             | 0.1130                   | 4                 | 12                 |
| GO:0010608 | biological process | posttranscriptional regulation of gene expression      | 14             | 0.1130                   | 4                 | 12                 |
| GO:0018130 | biological process | heterocycle biosynthetic process                       | 15             | 0.1410                   | 1                 | 2                  |
| GO:0019222 | biological process | regulation of metabolic process                        | 16             | 0.1130                   | 4                 | 12                 |

|            |                    |                                                                     |    |        |   |    |
|------------|--------------------|---------------------------------------------------------------------|----|--------|---|----|
| GO:0019438 | biological process | aromatic compound biosynthetic process                              | 17 | 0.1410 | 1 | 2  |
| GO:0031325 | biological process | positive regulation of cellular metabolic process                   | 18 | 0.1130 | 4 | 12 |
| GO:0009893 | biological process | positive regulation of metabolic process                            | 18 | 0.1130 | 4 | 12 |
| GO:0009896 | biological process | positive regulation of catabolic process                            | 18 | 0.1130 | 4 | 12 |
| GO:0031329 | biological process | regulation of cellular catabolic process                            | 18 | 0.1130 | 4 | 12 |
| GO:0031331 | biological process | positive regulation of cellular catabolic process                   | 18 | 0.1130 | 4 | 12 |
| GO:0048522 | biological process | positive regulation of cellular process                             | 18 | 0.1130 | 4 | 12 |
| GO:0032268 | biological process | regulation of cellular protein metabolic process                    | 19 | 0.1130 | 4 | 12 |
| GO:0006417 | biological process | regulation of translation                                           | 19 | 0.1130 | 4 | 12 |
| GO:0032879 | biological process | regulation of localization                                          | 20 | 0.1130 | 4 | 12 |
| GO:0034248 | biological process | regulation of cellular amide metabolic process                      | 21 | 0.1130 | 4 | 12 |
| GO:0034641 | biological process | cellular nitrogen compound metabolic process                        | 22 | 0.1410 | 1 | 2  |
| GO:0034645 | biological process | cellular macromolecule biosynthetic process                         | 23 | 0.1410 | 1 | 2  |
| GO:0034654 | biological process | nucleobase-containing compound biosynthetic process                 | 24 | 0.1410 | 1 | 2  |
| GO:0035821 | biological process | modification of morphology or physiology of other organism          | 25 | 0.1130 | 4 | 12 |
| GO:0039604 | biological process | suppression by virus of host translation                            | 26 | 0.1130 | 4 | 12 |
| GO:0019057 | biological process | modulation by virus of host translation                             | 26 | 0.1130 | 4 | 12 |
| GO:0039606 | biological process | suppression by virus of host translation initiation                 | 26 | 0.1130 | 4 | 12 |
| GO:0039611 | biological process | suppression by virus of host translation initiation factor activity | 26 | 0.1130 | 4 | 12 |
| GO:0039690 | biological process | positive stranded viral RNA replication                             | 27 | 0.0494 | 4 | 12 |
| GO:0019083 | biological process | viral transcription                                                 | 27 | 0.0494 | 4 | 42 |
| GO:0039689 | biological process | negative stranded viral RNA replication                             | 27 | 0.0494 | 4 | 42 |
| GO:0039694 | biological process | viral RNA genome replication                                        | 27 | 0.0494 | 8 | 54 |
| GO:0039696 | biological process | RNA-templated viral transcription                                   | 28 | 0.0113 | 4 | 42 |
| GO:0039697 | biological process | negative stranded viral RNA transcription                           | 29 | 0.0190 | 1 | 7  |

|            |                    |                                                                                              |    |        |   |    |
|------------|--------------------|----------------------------------------------------------------------------------------------|----|--------|---|----|
| GO:0043170 | biological process | macromolecule metabolic process                                                              | 30 | 0.1410 | 1 | 2  |
| GO:0044073 | biological process | modulation by symbiont of host translation                                                   | 31 | 0.1130 | 4 | 12 |
| GO:0044092 | biological process | negative regulation of molecular function                                                    | 32 | 0.1130 | 4 | 12 |
| GO:0044237 | biological process | cellular metabolic process                                                                   | 33 | 0.1410 | 1 | 2  |
| GO:0044238 | biological process | primary metabolic process                                                                    | 34 | 0.1410 | 1 | 2  |
| GO:0044249 | biological process | cellular biosynthetic process                                                                | 35 | 0.1410 | 1 | 2  |
| GO:0044260 | biological process | cellular macromolecule metabolic process                                                     | 36 | 0.1410 | 1 | 2  |
| GO:0044271 | biological process | cellular nitrogen compound biosynthetic process                                              | 37 | 0.1410 | 1 | 2  |
| GO:0044359 | biological process | modulation of molecular function in other organism                                           | 38 | 0.1130 | 4 | 12 |
| GO:0019048 | biological process | modulation by virus of host morphology or physiology                                         | 38 | 0.1130 | 4 | 12 |
| GO:0019054 | biological process | modulation by virus of host process                                                          | 38 | 0.1130 | 4 | 12 |
| GO:0039506 | biological process | modulation by virus of host molecular function                                               | 38 | 0.1130 | 4 | 12 |
| GO:0039507 | biological process | suppression by virus of host molecular function                                              | 38 | 0.1130 | 4 | 12 |
| GO:0039519 | biological process | modulation by virus of host autophagy                                                        | 38 | 0.1130 | 4 | 12 |
| GO:0039520 | biological process | induction by virus of host autophagy                                                         | 38 | 0.1130 | 4 | 12 |
| GO:0039656 | biological process | modulation by virus of host gene expression                                                  | 38 | 0.1130 | 4 | 12 |
| GO:0039657 | biological process | suppression by virus of host gene expression                                                 | 38 | 0.1130 | 4 | 12 |
| GO:0044003 | biological process | modification by symbiont of host morphology or physiology                                    | 38 | 0.1130 | 4 | 12 |
| GO:0044068 | biological process | modulation by symbiont of host cellular process                                              | 38 | 0.1130 | 4 | 12 |
| GO:0044362 | biological process | negative regulation of molecular function in other organism                                  | 38 | 0.1130 | 4 | 12 |
| GO:0051817 | biological process | modification of morphology or physiology of other organism involved in symbiotic interaction | 38 | 0.1130 | 4 | 12 |
| GO:0052055 | biological process | modulation by symbiont of host molecular function                                            | 38 | 0.1130 | 4 | 12 |

|            |                    |                                                                                               |    |        |   |    |
|------------|--------------------|-----------------------------------------------------------------------------------------------|----|--------|---|----|
| GO:0052056 | biological process | negative regulation by symbiont of host molecular function                                    | 38 | 0.1130 | 4 | 12 |
| GO:0052204 | biological process | negative regulation of molecular function in other organism involved in symbiotic interaction | 38 | 0.1130 | 4 | 12 |
| GO:0052205 | biological process | modulation of molecular function in other organism involved in symbiotic interaction          | 38 | 0.1130 | 4 | 12 |
| GO:0046483 | biological process | heterocycle metabolic process                                                                 | 39 | 0.1410 | 1 | 2  |
| GO:0048518 | biological process | positive regulation of biological process                                                     | 40 | 0.1130 | 4 | 12 |
| GO:0048519 | biological process | negative regulation of biological process                                                     | 41 | 0.1130 | 4 | 12 |
| GO:0050794 | biological process | regulation of cellular process                                                                | 42 | 0.1130 | 4 | 12 |
| GO:0050789 | biological process | regulation of biological process                                                              | 42 | 0.1130 | 4 | 12 |
| GO:0051246 | biological process | regulation of protein metabolic process                                                       | 43 | 0.1130 | 4 | 12 |
| GO:0051701 | biological process | interaction with host                                                                         | 44 | 0.0657 | 4 | 12 |
| GO:0016032 | biological process | viral process                                                                                 | 44 | 0.0657 | 9 | 57 |
| GO:0019079 | biological process | viral genome replication                                                                      | 44 | 0.0657 | 8 | 54 |
| GO:0044403 | biological process | symbiosis, encompassing mutualism through parasitism                                          | 44 | 0.0657 | 9 | 57 |
| GO:0044419 | biological process | interspecies interaction between organisms                                                    | 44 | 0.0657 | 9 | 57 |
| GO:0046755 | biological process | viral budding                                                                                 | 44 | 0.0657 | 1 | 3  |
| GO:0046765 | biological process | viral budding from nuclear membrane                                                           | 44 | 0.0657 | 1 | 3  |
| GO:0051704 | biological process | multi-organism process                                                                        | 45 | 0.0609 | 9 | 57 |
| GO:0052038 | biological process | modulation by symbiont of host intracellular transport                                        | 46 | 0.1130 | 4 | 12 |
| GO:0039522 | biological process | suppression by virus of host mRNA export from nucleus                                         | 46 | 0.1130 | 4 | 12 |
| GO:0052230 | biological process | modulation of intracellular transport in other organism involved in symbiotic interaction     | 47 | 0.1130 | 4 | 12 |
| GO:0060341 | biological process | regulation of cellular localization                                                           | 48 | 0.1130 | 4 | 12 |

|            |                    |                                                           |    |        |   |    |
|------------|--------------------|-----------------------------------------------------------|----|--------|---|----|
| GO:0032386 | biological process | regulation of intracellular transport                     | 48 | 0.1130 | 4 | 12 |
| GO:0051049 | biological process | regulation of transport                                   | 48 | 0.1130 | 4 | 12 |
| GO:0065007 | biological process | biological regulation                                     | 49 | 0.1130 | 4 | 12 |
| GO:0065009 | biological process | regulation of molecular function                          | 50 | 0.1130 | 4 | 12 |
| GO:0071704 | biological process | organic substance metabolic process                       | 51 | 0.1410 | 1 | 2  |
| GO:0071897 | biological process | DNA biosynthetic process                                  | 52 | 0.1410 | 1 | 2  |
| GO:0090304 | biological process | nucleic acid metabolic process                            | 53 | 0.1410 | 1 | 2  |
| GO:1901360 | biological process | organic cyclic compound metabolic process                 | 54 | 0.1410 | 1 | 2  |
| GO:1901362 | biological process | organic cyclic compound biosynthetic process              | 55 | 0.1410 | 1 | 2  |
| GO:1901576 | biological process | organic substance biosynthetic process                    | 56 | 0.1410 | 1 | 2  |
| GO:2000112 | biological process | regulation of cellular macromolecule biosynthetic process | 57 | 0.1130 | 4 | 12 |
| GO:0009889 | biological process | regulation of biosynthetic process                        | 57 | 0.1130 | 4 | 12 |
| GO:0010468 | biological process | regulation of gene expression                             | 57 | 0.1130 | 4 | 12 |
| GO:0010556 | biological process | regulation of macromolecule biosynthetic process          | 57 | 0.1130 | 4 | 12 |
| GO:0031323 | biological process | regulation of cellular metabolic process                  | 57 | 0.1130 | 4 | 12 |
| GO:0031326 | biological process | regulation of cellular biosynthetic process               | 57 | 0.1130 | 4 | 12 |
| GO:0051171 | biological process | regulation of nitrogen compound metabolic process         | 57 | 0.1130 | 4 | 12 |
| GO:0060255 | biological process | regulation of macromolecule metabolic process             | 57 | 0.1130 | 4 | 12 |
| GO:0080090 | biological process | regulation of primary metabolic process                   | 57 | 0.1130 | 4 | 12 |
| GO:0001681 | molecular function | sialate O-acetyltransferase activity                      | 58 | 0.2260 | 1 | 2  |
| GO:0008126 | molecular function | acetyltransferase activity                                | 58 | 0.2260 | 1 | 2  |
| GO:0003674 | molecular function | molecular function                                        | 59 | 0.1195 | 4 | 11 |
| GO:0003824 | molecular function | catalytic activity                                        | 60 | 0.1480 | 3 | 9  |
| GO:0004518 | molecular function | nuclease activity                                         | 61 | 0.1930 | 1 | 2  |
| GO:0004519 | molecular function | endonuclease activity                                     | 61 | 0.1930 | 1 | 2  |

|            |                    |                                                                 |    |        |   |   |
|------------|--------------------|-----------------------------------------------------------------|----|--------|---|---|
| GO:0005488 | molecular function | binding                                                         | 62 | 0.0340 | 1 | 2 |
| GO:0016740 | molecular function | transferase activity                                            | 63 | 0.0250 | 1 | 5 |
| GO:0016772 | molecular function | transferase activity, transferring phosphorus-containing groups | 64 | 0.0250 | 1 | 5 |
| GO:0016779 | molecular function | nucleotidyltransferase activity                                 | 65 | 0.0250 | 1 | 5 |
| GO:0016787 | molecular function | hydrolase activity                                              | 66 | 0.2095 | 2 | 4 |
| GO:0016788 | molecular function | hydrolase activity, acting on ester bonds                       | 67 | 0.2095 | 2 | 4 |
| GO:0034062 | molecular function | 5'-3' RNA polymerase activity                                   | 68 | 0.0250 | 1 | 5 |
| GO:0003968 | molecular function | RNA-directed 5'-3' RNA polymerase activity                      | 68 | 0.0250 | 1 | 5 |
| GO:0097747 | molecular function | RNA polymerase activity                                         | 68 | 0.0250 | 1 | 5 |
| GO:0034338 | molecular function | short-chain carboxylesterase activity                           | 69 | 0.2260 | 1 | 2 |
| GO:0052689 | molecular function | carboxylic ester hydrolase activity                             | 70 | 0.2260 | 1 | 2 |

Table S2: Structural coverage of subVOG mRNAs associated with GO terms. The GO terms are clustered into functionally similar groups using Revigo. All GO terms without regard on evidence codes were used for the clustering. A color coded version of the table is provided online at [http://subvogs.bio.wzw.tum.de/sup/table\\_s2.html](http://subvogs.bio.wzw.tum.de/sup/table_s2.html).

| GO term    | Ontology           | Description                                      | Revigo cluster | Mean structural coverage | Number of subVOGs | Number of proteins |
|------------|--------------------|--------------------------------------------------|----------------|--------------------------|-------------------|--------------------|
| GO:0001505 | biological process | regulation of neurotransmitter levels            | 1              | 0.1686                   | 20                | 61                 |
| GO:0001510 | biological process | RNA methylation                                  | 2              | 0.0810                   | 1                 | 4                  |
| GO:0001906 | biological process | cell killing                                     | 3              | 0.2271                   | 29                | 148                |
| GO:0002097 | biological process | tRNA wobble base modification                    | 4              | 0.0620                   | 1                 | 3                  |
| GO:0002376 | biological process | immune system process                            | 5              | 0.1453                   | 4                 | 11                 |
| GO:0002920 | biological process | regulation of humoral immune response            | 6              | 0.1973                   | 2                 | 5                  |
| GO:0002682 | biological process | regulation of immune system process              | 6              | 0.1973                   | 94                | 316                |
| GO:0002697 | biological process | regulation of immune effector process            | 6              | 0.1973                   | 2                 | 5                  |
| GO:0050690 | biological process | regulation of defense response to virus by virus | 6              | 0.1973                   | 95                | 319                |
| GO:0005975 | biological process | carbohydrate metabolic process                   | 7              | 0.1705                   | 32                | 116                |
| GO:0005976 | biological process | polysaccharide metabolic process                 | 8              | 0.1778                   | 4                 | 10                 |
| GO:0005996 | biological process | monosaccharide metabolic process                 | 9              | 0.0170                   | 1                 | 11                 |
| GO:0006002 | biological process | fructose 6-phosphate metabolic process           | 10             | 0.1400                   | 1                 | 7                  |
| GO:0006022 | biological process | aminoglycan metabolic process                    | 11             | 0.1659                   | 155               | 915                |
| GO:0006040 | biological process | amino sugar metabolic process                    | 12             | 0.1625                   | 31                | 96                 |
| GO:0006081 | biological process | cellular aldehyde metabolic process              | 13             | 0.1735                   | 2                 | 13                 |
| GO:0006082 | biological process | organic acid metabolic process                   | 14             | 0.1519                   | 73                | 274                |
| GO:0006091 | biological process | generation of precursor metabolites and energy   | 15             | 0.1954                   | 13                | 92                 |

|            |                    |                                                  |    |        |      |      |
|------------|--------------------|--------------------------------------------------|----|--------|------|------|
| GO:0006109 | biological process | regulation of carbohydrate metabolic process     | 16 | 0.3035 | 2    | 4    |
| GO:0006139 | biological process | nucleobase-containing compound metabolic process | 17 | 0.1306 | 1774 | 8662 |
| GO:0006259 | biological process | DNA metabolic process                            | 18 | 0.1301 | 1014 | 5301 |
| GO:0006260 | biological process | DNA replication                                  | 19 | 0.1146 | 516  | 2643 |
| GO:0006261 | biological process | DNA-dependent DNA replication                    | 20 | 0.1142 | 121  | 382  |
| GO:0006265 | biological process | DNA topological change                           | 21 | 0.1377 | 43   | 228  |
| GO:0006266 | biological process | DNA ligation                                     | 22 | 0.1471 | 11   | 55   |
| GO:0006270 | biological process | DNA replication initiation                       | 23 | 0.2598 | 12   | 35   |
| GO:0006284 | biological process | base-excision repair                             | 24 | 0.0986 | 14   | 57   |
| GO:0006289 | biological process | nucleotide-excision repair                       | 25 | 0.0723 | 4    | 13   |
| GO:0006298 | biological process | mismatch repair                                  | 26 | 0.0425 | 4    | 10   |
| GO:0006304 | biological process | DNA modification                                 | 27 | 0.1373 | 36   | 166  |
| GO:0006305 | biological process | DNA alkylation                                   | 28 | 0.1230 | 32   | 153  |
| GO:0044728 | biological process | DNA methylation or demethylation                 | 28 | 0.1230 | 32   | 153  |
| GO:0006310 | biological process | DNA recombination                                | 29 | 0.1468 | 208  | 1044 |
| GO:0006313 | biological process | transposition, DNA-mediated                      | 30 | 0.2166 | 10   | 26   |
| GO:0006325 | biological process | chromatin organization                           | 31 | 0.3430 | 1    | 2    |
| GO:0006352 | biological process | DNA-templated transcription, initiation          | 32 | 0.1353 | 35   | 140  |
| GO:0006353 | biological process | DNA-templated transcription, termination         | 33 | 0.1983 | 3    | 9    |
| GO:0006370 | biological process | 7-methylguanosine mRNA capping                   | 34 | 0.1916 | 14   | 48   |
| GO:0006396 | biological process | RNA processing                                   | 35 | 0.1124 | 83   | 374  |
| GO:0006402 | biological process | mRNA catabolic process                           | 36 | 0.1883 | 2    | 4    |
| GO:0006308 | biological process | DNA catabolic process                            | 36 | 0.1883 | 4    | 17   |
| GO:0006397 | biological process | mRNA processing                                  | 36 | 0.1883 | 19   | 76   |
| GO:0006401 | biological process | RNA catabolic process                            | 36 | 0.1883 | 7    | 22   |
| GO:0009143 | biological process | nucleoside triphosphate catabolic process        | 36 | 0.1883 | 2    | 4    |



|            |                    |                                                  |    |        |      |      |
|------------|--------------------|--------------------------------------------------|----|--------|------|------|
| GO:0009166 | biological process | nucleotide catabolic process                     | 36 | 0.1883 | 13   | 53   |
| GO:0009264 | biological process | deoxyribonucleotide catabolic process            | 36 | 0.1883 | 11   | 45   |
| GO:0034661 | biological process | ncRNA catabolic process                          | 36 | 0.1883 | 5    | 18   |
| GO:0006413 | biological process | translational initiation                         | 37 | 0.1225 | 2    | 12   |
| GO:0006420 | biological process | arginyl-tRNA aminoacylation                      | 38 | 0.0070 | 1    | 3    |
| GO:0006421 | biological process | asparaginyl-tRNA aminoacylation                  | 39 | 0.0720 | 1    | 2    |
| GO:0006428 | biological process | isoleucyl-tRNA aminoacylation                    | 40 | 0.0610 | 1    | 3    |
| GO:0006431 | biological process | methionyl-tRNA aminoacylation                    | 41 | 0.1090 | 1    | 2    |
| GO:0006457 | biological process | protein folding                                  | 42 | 0.2132 | 18   | 91   |
| GO:0006487 | biological process | protein N-linked glycosylation                   | 43 | 0.0180 | 1    | 4    |
| GO:0006497 | biological process | protein lipidation                               | 44 | 0.3058 | 4    | 10   |
| GO:0006508 | biological process | proteolysis                                      | 45 | 0.1755 | 27   | 98   |
| GO:0006518 | biological process | peptide metabolic process                        | 46 | 0.2159 | 1    | 2    |
| GO:0043604 | biological process | amide biosynthetic process                       | 46 | 0.2159 | 53   | 196  |
| GO:0006541 | biological process | glutamine metabolic process                      | 47 | 0.1602 | 6    | 23   |
| GO:0006560 | biological process | proline metabolic process                        | 48 | 0.0175 | 1    | 9    |
| GO:0009084 | biological process | glutamine family amino acid biosynthetic process | 48 | 0.0175 | 1    | 3    |
| GO:0006575 | biological process | cellular modified amino acid metabolic process   | 49 | 0.1569 | 50   | 182  |
| GO:0006629 | biological process | lipid metabolic process                          | 50 | 0.1251 | 31   | 117  |
| GO:0006725 | biological process | cellular aromatic compound metabolic process     | 51 | 0.1318 | 1830 | 8877 |
| GO:0006730 | biological process | one-carbon metabolic process                     | 52 | 0.2320 | 1    | 2    |
| GO:0006739 | biological process | NADP metabolic process                           | 53 | 0.1735 | 2    | 13   |
| GO:0006766 | biological process | vitamin metabolic process                        | 54 | 0.2650 | 5    | 17   |
| GO:0006790 | biological process | sulfur compound metabolic process                | 55 | 0.4793 | 4    | 12   |
| GO:0006793 | biological process | phosphorus metabolic process                     | 56 | 0.1545 | 235  | 1412 |
| GO:0006796 | biological process | phosphate-containing compound metabolic process  | 57 | 0.1541 | 233  | 1407 |

|            |                    |                                           |    |        |      |       |
|------------|--------------------|-------------------------------------------|----|--------|------|-------|
| GO:0019637 | biological process | organophosphate metabolic process         | 57 | 0.1541 | 233  | 1407  |
| GO:0006807 | biological process | nitrogen compound metabolic process       | 58 | 0.1364 | 2061 | 10074 |
| GO:0006811 | biological process | ion transport                             | 59 | 0.1544 | 5    | 27    |
| GO:0006820 | biological process | anion transport                           | 60 | 0.0828 | 4    | 25    |
| GO:0034220 | biological process | ion transmembrane transport               | 60 | 0.0828 | 1    | 15    |
| GO:0006869 | biological process | lipid transport                           | 61 | 0.1950 | 2    | 4     |
| GO:0006898 | biological process | receptor-mediated endocytosis             | 62 | 0.1322 | 5    | 11    |
| GO:0006950 | biological process | response to stress                        | 63 | 0.1536 | 205  | 1106  |
| GO:0006952 | biological process | defense response                          | 64 | 0.2462 | 19   | 82    |
| GO:0006974 | biological process | cellular response to DNA damage stimulus  | 65 | 0.1443 | 171  | 959   |
| GO:0006979 | biological process | response to oxidative stress              | 66 | 0.1005 | 2    | 6     |
| GO:0006996 | biological process | organelle organization                    | 67 | 0.1203 | 102  | 562   |
| GO:0007049 | biological process | cell cycle                                | 68 | 0.0770 | 3    | 9     |
| GO:0007154 | biological process | cell communication                        | 69 | 0.1829 | 8    | 37    |
| GO:0007155 | biological process | cell adhesion                             | 70 | 0.0995 | 4    | 10    |
| GO:0007166 | biological process | cell surface receptor signaling pathway   | 71 | 0.2150 | 1    | 2     |
| GO:0007264 | biological process | small GTPase mediated signal transduction | 72 | 0.2020 | 1    | 2     |
| GO:0008150 | biological process | biological process                        | 73 | 0.1392 | 3435 | 16134 |
| GO:0008152 | biological process | metabolic process                         | 74 | 0.1385 | 2201 | 10701 |
| GO:0008202 | biological process | steroid metabolic process                 | 75 | 0.1166 | 5    | 26    |
| GO:0008216 | biological process | spermidine metabolic process              | 76 | 0.2253 | 6    | 21    |
| GO:0008217 | biological process | regulation of blood pressure              | 77 | 0.1750 | 1    | 2     |
| GO:0008380 | biological process | RNA splicing                              | 78 | 0.1175 | 2    | 4     |
| GO:0008654 | biological process | phospholipid biosynthetic process         | 79 | 0.2727 | 1    | 3     |
| GO:0006644 | biological process | phospholipid metabolic process            | 79 | 0.2727 | 4    | 10    |
| GO:0008610 | biological process | lipid biosynthetic process                | 79 | 0.2727 | 6    | 29    |
| GO:0044255 | biological process | cellular lipid metabolic process          | 79 | 0.2727 | 5    | 12    |

|            |                    |                                                       |    |        |      |      |
|------------|--------------------|-------------------------------------------------------|----|--------|------|------|
| GO:0009056 | biological process | catabolic process                                     | 80 | 0.1604 | 162  | 951  |
| GO:0009058 | biological process | biosynthetic process                                  | 81 | 0.1287 | 1290 | 6001 |
| GO:0009059 | biological process | macromolecule biosynthetic process                    | 82 | 0.1197 | 1019 | 4509 |
| GO:0009065 | biological process | glutamine family amino acid catabolic process         | 83 | 0.0180 | 1    | 9    |
| GO:0009066 | biological process | aspartate family amino acid metabolic process         | 84 | 0.2480 | 4    | 17   |
| GO:0009069 | biological process | serine family amino acid metabolic process            | 85 | 0.1732 | 21   | 64   |
| GO:0009071 | biological process | serine family amino acid catabolic process            | 86 | 0.2716 | 1    | 3    |
| GO:0006563 | biological process | L-serine metabolic process                            | 86 | 0.2716 | 2    | 5    |
| GO:0009070 | biological process | serine family amino acid biosynthetic process         | 86 | 0.2716 | 20   | 61   |
| GO:0019264 | biological process | glycine biosynthetic process from serine              | 86 | 0.2716 | 1    | 2    |
| GO:0009072 | biological process | aromatic amino acid family metabolic process          | 87 | 0.1325 | 2    | 15   |
| GO:0009112 | biological process | nucleobase metabolic process                          | 88 | 0.1240 | 1    | 3    |
| GO:0009129 | biological process | pyrimidine nucleoside monophosphate metabolic process | 89 | 0.1513 | 83   | 497  |
| GO:0009132 | biological process | nucleoside diphosphate metabolic process              | 90 | 0.1563 | 6    | 15   |
| GO:0009141 | biological process | nucleoside triphosphate metabolic process             | 91 | 0.0846 | 41   | 165  |
| GO:0009126 | biological process | purine nucleoside monophosphate metabolic process     | 91 | 0.0846 | 2    | 15   |
| GO:0009142 | biological process | nucleoside triphosphate biosynthetic process          | 91 | 0.0846 | 6    | 26   |
| GO:0009152 | biological process | purine ribonucleotide biosynthetic process            | 91 | 0.0846 | 3    | 17   |
| GO:0009161 | biological process | ribonucleoside monophosphate metabolic process        | 91 | 0.0846 | 12   | 67   |
| GO:0009259 | biological process | ribonucleotide metabolic process                      | 91 | 0.0846 | 14   | 72   |
| GO:0046390 | biological process | ribose phosphate biosynthetic process                 | 91 | 0.0846 | 13   | 69   |
| GO:0009144 | biological process | purine nucleoside triphosphate metabolic process      | 92 | 0.1564 | 1    | 2    |
| GO:0006753 | biological process | nucleoside phosphate metabolic process                | 92 | 0.1564 | 227  | 1388 |
| GO:0009117 | biological process | nucleotide metabolic process                          | 92 | 0.1564 | 225  | 1384 |
| GO:0009123 | biological process | nucleoside monophosphate metabolic process            | 92 | 0.1564 | 85   | 512  |

|            |                    |                                                           |     |        |     |      |
|------------|--------------------|-----------------------------------------------------------|-----|--------|-----|------|
| GO:0009199 | biological process | ribonucleoside triphosphate metabolic process             | 92  | 0.1564 | 1   | 2    |
| GO:0090407 | biological process | organophosphate biosynthetic process                      | 92  | 0.1564 | 163 | 1101 |
| GO:1901293 | biological process | nucleoside phosphate biosynthetic process                 | 92  | 0.1564 | 161 | 1096 |
| GO:0009147 | biological process | pyrimidine nucleoside triphosphate metabolic process      | 93  | 0.1118 | 39  | 161  |
| GO:0009162 | biological process | deoxyribonucleoside monophosphate metabolic process       | 94  | 0.1640 | 73  | 445  |
| GO:0009173 | biological process | pyrimidine ribonucleoside monophosphate metabolic process | 95  | 0.0587 | 10  | 52   |
| GO:0009200 | biological process | deoxyribonucleoside triphosphate metabolic process        | 96  | 0.1103 | 38  | 159  |
| GO:0009202 | biological process | deoxyribonucleoside triphosphate biosynthetic process     | 97  | 0.0756 | 5   | 24   |
| GO:0009218 | biological process | pyrimidine ribonucleotide metabolic process               | 98  | 0.0687 | 11  | 54   |
| GO:0009225 | biological process | nucleotide-sugar metabolic process                        | 99  | 0.0916 | 5   | 38   |
| GO:0009226 | biological process | nucleotide-sugar biosynthetic process                     | 100 | 0.0511 | 4   | 16   |
| GO:0009298 | biological process | GDP-mannose biosynthetic process                          | 100 | 0.0511 | 1   | 4    |
| GO:0019673 | biological process | GDP-mannose metabolic process                             | 100 | 0.0511 | 2   | 26   |
| GO:0009235 | biological process | cobalamin metabolic process                               | 101 | 0.2049 | 4   | 13   |
| GO:0006778 | biological process | porphyrin-containing compound metabolic process           | 101 | 0.2049 | 1   | 5    |
| GO:0015939 | biological process | pantothenate metabolic process                            | 101 | 0.2049 | 1   | 4    |
| GO:0033014 | biological process | tetrapyrrole biosynthetic process                         | 101 | 0.2049 | 7   | 28   |
| GO:0042559 | biological process | pteridine-containing compound biosynthetic process        | 101 | 0.2049 | 47  | 173  |
| GO:0046653 | biological process | tetrahydrofolate metabolic process                        | 101 | 0.2049 | 47  | 172  |
| GO:0046654 | biological process | tetrahydrofolate biosynthetic process                     | 101 | 0.2049 | 46  | 170  |
| GO:0009254 | biological process | peptidoglycan turnover                                    | 102 | 0.1764 | 10  | 45   |
| GO:0006026 | biological process | aminoglycan catabolic process                             | 102 | 0.1764 | 120 | 793  |

|            |                    |                                                                            |     |        |     |     |
|------------|--------------------|----------------------------------------------------------------------------|-----|--------|-----|-----|
| GO:0006027 | biological process | glycosaminoglycan catabolic process                                        | 102 | 0.1764 | 114 | 775 |
| GO:0030203 | biological process | glycosaminoglycan metabolic process                                        | 102 | 0.1764 | 125 | 822 |
| GO:0009262 | biological process | deoxyribonucleotide metabolic process                                      | 103 | 0.1488 | 162 | 939 |
| GO:0009263 | biological process | deoxyribonucleotide biosynthetic process                                   | 104 | 0.1538 | 118 | 759 |
| GO:0009308 | biological process | amine metabolic process                                                    | 105 | 0.1878 | 10  | 35  |
| GO:0009372 | biological process | quorum sensing                                                             | 106 | 0.0340 | 1   | 2   |
| GO:0009411 | biological process | response to UV                                                             | 107 | 0.0840 | 2   | 7   |
| GO:0009445 | biological process | putrescine metabolic process                                               | 108 | 0.0960 | 1   | 4   |
| GO:0009451 | biological process | RNA modification                                                           | 109 | 0.0877 | 7   | 30  |
| GO:0009605 | biological process | response to external stimulus                                              | 110 | 0.1497 | 126 | 461 |
| GO:0009607 | biological process | response to biotic stimulus                                                | 111 | 0.1499 | 115 | 410 |
| GO:0009628 | biological process | response to abiotic stimulus                                               | 112 | 0.0957 | 3   | 9   |
| GO:0009653 | biological process | anatomical structure morphogenesis                                         | 113 | 0.0842 | 3   | 11  |
| GO:0032989 | biological process | cellular component morphogenesis                                           | 113 | 0.0842 | 1   | 5   |
| GO:0009892 | biological process | negative regulation of metabolic process                                   | 114 | 0.1758 | 44  | 150 |
| GO:0009890 | biological process | negative regulation of biosynthetic process                                | 114 | 0.1758 | 12  | 44  |
| GO:0010629 | biological process | negative regulation of gene expression                                     | 114 | 0.1758 | 41  | 142 |
| GO:0010648 | biological process | negative regulation of cell communication                                  | 114 | 0.1758 | 68  | 225 |
| GO:0010941 | biological process | regulation of cell death                                                   | 114 | 0.1758 | 45  | 147 |
| GO:0023057 | biological process | negative regulation of signaling                                           | 114 | 0.1758 | 68  | 225 |
| GO:0031324 | biological process | negative regulation of cellular metabolic process                          | 114 | 0.1758 | 15  | 52  |
| GO:0043066 | biological process | negative regulation of apoptotic process                                   | 114 | 0.1758 | 8   | 21  |
| GO:0045934 | biological process | negative regulation of nucleobase-containing<br>compound metabolic process | 114 | 0.1758 | 11  | 32  |
| GO:0048523 | biological process | negative regulation of cellular process                                    | 114 | 0.1758 | 113 | 404 |
| GO:0048585 | biological process | negative regulation of response to stimulus                                | 114 | 0.1758 | 92  | 309 |

|            |                    |                                                                |     |        |      |       |
|------------|--------------------|----------------------------------------------------------------|-----|--------|------|-------|
| GO:0051172 | biological process | negative regulation of nitrogen compound metabolic process     | 114 | 0.1758 | 15   | 52    |
| GO:0060548 | biological process | negative regulation of cell death                              | 114 | 0.1758 | 13   | 32    |
| GO:0080134 | biological process | regulation of response to stress                               | 114 | 0.1758 | 90   | 304   |
| GO:0009894 | biological process | regulation of catabolic process                                | 115 | 0.1311 | 51   | 167   |
| GO:0009987 | biological process | cellular process                                               | 116 | 0.1397 | 2291 | 10962 |
| GO:0009991 | biological process | response to extracellular stimulus                             | 117 | 0.1825 | 8    | 37    |
| GO:0042330 | biological process | taxis                                                          | 117 | 0.1825 | 3    | 6     |
| GO:0071496 | biological process | cellular response to external stimulus                         | 117 | 0.1825 | 8    | 37    |
| GO:0010207 | biological process | photosystem II assembly                                        | 118 | 0.1789 | 1    | 3     |
| GO:0009772 | biological process | photosynthetic electron transport in photosystem II            | 118 | 0.1789 | 12   | 90    |
| GO:0010468 | biological process | regulation of gene expression                                  | 119 | 0.1535 | 226  | 893   |
| GO:0009889 | biological process | regulation of biosynthetic process                             | 119 | 0.1535 | 232  | 901   |
| GO:0019219 | biological process | regulation of nucleobase-containing compound metabolic process | 119 | 0.1535 | 242  | 928   |
| GO:0031323 | biological process | regulation of cellular metabolic process                       | 119 | 0.1535 | 288  | 1090  |
| GO:0051171 | biological process | regulation of nitrogen compound metabolic process              | 119 | 0.1535 | 250  | 958   |
| GO:0051252 | biological process | regulation of RNA metabolic process                            | 119 | 0.1535 | 205  | 781   |
| GO:0060255 | biological process | regulation of macromolecule metabolic process                  | 119 | 0.1535 | 270  | 1058  |
| GO:0080090 | biological process | regulation of primary metabolic process                        | 119 | 0.1535 | 252  | 962   |
| GO:1903506 | biological process | regulation of nucleic acid-templated transcription             | 119 | 0.1535 | 173  | 668   |
| GO:2000112 | biological process | regulation of cellular macromolecule biosynthetic process      | 119 | 0.1535 | 211  | 827   |
| GO:2001141 | biological process | regulation of RNA biosynthetic process                         | 119 | 0.1535 | 194  | 742   |
| GO:0010469 | biological process | regulation of receptor activity                                | 120 | 0.3270 | 2    | 5     |
| GO:0010506 | biological process | regulation of autophagy                                        | 121 | 0.1397 | 46   | 149   |

|            |                    |                                                            |     |        |     |      |
|------------|--------------------|------------------------------------------------------------|-----|--------|-----|------|
| GO:0010604 | biological process | positive regulation of macromolecule metabolic process     | 122 | 0.1583 | 35  | 156  |
| GO:0009891 | biological process | positive regulation of biosynthetic process                | 122 | 0.1583 | 7   | 32   |
| GO:0009893 | biological process | positive regulation of metabolic process                   | 122 | 0.1583 | 76  | 295  |
| GO:0010628 | biological process | positive regulation of gene expression                     | 122 | 0.1583 | 24  | 126  |
| GO:0051054 | biological process | positive regulation of DNA metabolic process               | 122 | 0.1583 | 1   | 2    |
| GO:0051173 | biological process | positive regulation of nitrogen compound metabolic process | 122 | 0.1583 | 17  | 60   |
| GO:0051254 | biological process | positive regulation of RNA metabolic process               | 122 | 0.1583 | 16  | 58   |
| GO:1902680 | biological process | positive regulation of RNA biosynthetic process            | 122 | 0.1583 | 6   | 30   |
| GO:0010608 | biological process | posttranscriptional regulation of gene expression          | 123 | 0.0750 | 1   | 12   |
| GO:0010646 | biological process | regulation of cell communication                           | 124 | 0.1573 | 73  | 238  |
| GO:0015074 | biological process | DNA integration                                            | 125 | 0.1498 | 123 | 688  |
| GO:0015698 | biological process | inorganic anion transport                                  | 126 | 0.0680 | 2   | 21   |
| GO:0015711 | biological process | organic anion transport                                    | 127 | 0.1950 | 2   | 4    |
| GO:0015849 | biological process | organic acid transport                                     | 128 | 0.1950 | 2   | 4    |
| GO:0015931 | biological process | nucleobase-containing compound transport                   | 129 | 0.1123 | 15  | 99   |
| GO:0015979 | biological process | photosynthesis                                             | 130 | 0.2910 | 2   | 5    |
| GO:0016042 | biological process | lipid catabolic process                                    | 131 | 0.0566 | 7   | 28   |
| GO:0016051 | biological process | carbohydrate biosynthetic process                          | 132 | 0.1778 | 4   | 10   |
| GO:0016070 | biological process | RNA metabolic process                                      | 133 | 0.1198 | 548 | 2031 |
| GO:0016071 | biological process | mRNA metabolic process                                     | 134 | 0.2031 | 21  | 80   |
| GO:0016072 | biological process | rRNA metabolic process                                     | 135 | 0.0925 | 6   | 20   |
| GO:0006364 | biological process | rRNA processing                                            | 135 | 0.0925 | 1   | 2    |
| GO:0006399 | biological process | tRNA metabolic process                                     | 135 | 0.0925 | 19  | 77   |
| GO:0006400 | biological process | tRNA modification                                          | 135 | 0.0925 | 6   | 26   |
| GO:0008033 | biological process | tRNA processing                                            | 135 | 0.0925 | 12  | 56   |

|            |                    |                                                     |     |        |     |      |
|------------|--------------------|-----------------------------------------------------|-----|--------|-----|------|
| GO:0034470 | biological process | ncRNA processing                                    | 135 | 0.0925 | 13  | 58   |
| GO:0016192 | biological process | vesicle-mediated transport                          | 136 | 0.0731 | 10  | 110  |
| GO:0016310 | biological process | phosphorylation                                     | 137 | 0.0230 | 1   | 3    |
| GO:0016539 | biological process | intein-mediated protein splicing                    | 138 | 0.2358 | 9   | 25   |
| GO:0016485 | biological process | protein processing                                  | 138 | 0.2358 | 17  | 64   |
| GO:0030908 | biological process | protein splicing                                    | 138 | 0.2358 | 10  | 28   |
| GO:0097428 | biological process | protein maturation by iron-sulfur cluster transfer  | 138 | 0.2358 | 1   | 2    |
| GO:0017006 | biological process | protein-tetrapyrrole linkage                        | 139 | 0.2212 | 5   | 26   |
| GO:0017144 | biological process | drug metabolic process                              | 140 | 0.1726 | 53  | 165  |
| GO:0018126 | biological process | protein hydroxylation                               | 141 | 0.3048 | 4   | 21   |
| GO:0018130 | biological process | heterocycle biosynthetic process                    | 142 | 0.1328 | 746 | 3266 |
| GO:0018142 | biological process | protein-DNA covalent cross-linking                  | 143 | 0.1118 | 36  | 104  |
| GO:0018144 | biological process | RNA-protein covalent cross-linking                  | 143 | 0.1118 | 123 | 409  |
| GO:0018143 | biological process | nucleic acid-protein covalent cross-linking         | 144 | 0.1071 | 159 | 513  |
| GO:0018193 | biological process | peptidyl-amino acid modification                    | 145 | 0.3115 | 6   | 26   |
| GO:0018197 | biological process | peptidyl-aspartic acid modification                 | 146 | 0.3048 | 4   | 21   |
| GO:0018298 | biological process | protein-chromophore linkage                         | 147 | 0.1190 | 1   | 2    |
| GO:0018904 | biological process | ether metabolic process                             | 148 | 0.1333 | 4   | 15   |
| GO:0019082 | biological process | viral protein processing                            | 149 | 0.1817 | 22  | 55   |
| GO:0019083 | biological process | viral transcription                                 | 150 | 0.0955 | 29  | 110  |
| GO:0039686 | biological process | bidirectional double-stranded viral DNA replication | 150 | 0.0955 | 20  | 135  |
| GO:0039689 | biological process | negative stranded viral RNA replication             | 150 | 0.0955 | 1   | 2    |
| GO:0039693 | biological process | viral DNA genome replication                        | 150 | 0.0955 | 70  | 353  |
| GO:0039694 | biological process | viral RNA genome replication                        | 150 | 0.0955 | 306 | 997  |
| GO:0039696 | biological process | RNA-templated viral transcription                   | 150 | 0.0955 | 1   | 2    |
| GO:0046782 | biological process | regulation of viral transcription                   | 150 | 0.0955 | 29  | 127  |
| GO:0075526 | biological process | cap snatching                                       | 150 | 0.0955 | 1   | 2    |



|            |                    |                                                            |     |        |     |      |
|------------|--------------------|------------------------------------------------------------|-----|--------|-----|------|
| GO:0019222 | biological process | regulation of metabolic process                            | 151 | 0.1509 | 310 | 1195 |
| GO:0019438 | biological process | aromatic compound biosynthetic process                     | 152 | 0.1328 | 747 | 3278 |
| GO:0019439 | biological process | aromatic compound catabolic process                        | 153 | 0.1733 | 26  | 96   |
| GO:0043632 | biological process | modification-dependent macromolecule catabolic process     | 153 | 0.1733 | 4   | 12   |
| GO:0044265 | biological process | cellular macromolecule catabolic process                   | 153 | 0.1733 | 15  | 51   |
| GO:0044270 | biological process | cellular nitrogen compound catabolic process               | 153 | 0.1733 | 26  | 96   |
| GO:0046700 | biological process | heterocycle catabolic process                              | 153 | 0.1733 | 27  | 105  |
| GO:0051603 | biological process | proteolysis involved in cellular protein catabolic process | 153 | 0.1733 | 4   | 12   |
| GO:0019538 | biological process | protein metabolic process                                  | 154 | 0.1274 | 212 | 703  |
| GO:0019692 | biological process | deoxyribose phosphate metabolic process                    | 155 | 0.1462 | 117 | 619  |
| GO:0019693 | biological process | ribose phosphate metabolic process                         | 156 | 0.0937 | 16  | 85   |
| GO:0019725 | biological process | cellular homeostasis                                       | 157 | 0.1554 | 60  | 297  |
| GO:0042592 | biological process | homeostatic process                                        | 157 | 0.1554 | 62  | 328  |
| GO:0045454 | biological process | cell redox homeostasis                                     | 157 | 0.1554 | 57  | 283  |
| GO:0019835 | biological process | cytolysis                                                  | 158 | 0.2859 | 61  | 313  |
| GO:0022607 | biological process | cellular component assembly                                | 159 | 0.1566 | 66  | 163  |
| GO:0022610 | biological process | biological adhesion                                        | 160 | 0.1201 | 130 | 450  |
| GO:0023051 | biological process | regulation of signaling                                    | 161 | 0.1573 | 73  | 238  |
| GO:0030154 | biological process | cell differentiation                                       | 162 | 0.1932 | 1   | 3    |
| GO:0048869 | biological process | cellular developmental process                             | 162 | 0.1932 | 2   | 8    |
| GO:0030162 | biological process | regulation of proteolysis                                  | 163 | 0.1484 | 5   | 13   |
| GO:0031399 | biological process | regulation of protein modification process                 | 163 | 0.1484 | 24  | 74   |
| GO:0032268 | biological process | regulation of cellular protein metabolic process           | 163 | 0.1484 | 28  | 94   |
| GO:0030163 | biological process | protein catabolic process                                  | 164 | 0.0560 | 3   | 10   |
| GO:0030258 | biological process | lipid modification                                         | 165 | 0.0230 | 1   | 3    |

|            |                    |                                                           |     |        |    |     |
|------------|--------------------|-----------------------------------------------------------|-----|--------|----|-----|
| GO:0031123 | biological process | RNA 3'-end processing                                     | 166 | 0.1190 | 3  | 18  |
| GO:0031163 | biological process | metallo-sulfur cluster assembly                           | 167 | 0.4105 | 2  | 7   |
| GO:0031341 | biological process | regulation of cell killing                                | 168 | 0.3430 | 9  | 38  |
| GO:0031342 | biological process | negative regulation of cell killing                       | 168 | 0.3430 | 8  | 36  |
| GO:0031343 | biological process | positive regulation of cell killing                       | 169 | 0.0700 | 1  | 2   |
| GO:0051715 | biological process | cytolysis in other organism                               | 169 | 0.0700 | 1  | 19  |
| GO:0031365 | biological process | N-terminal protein amino acid modification                | 170 | 0.3058 | 4  | 10  |
| GO:0031638 | biological process | zymogen activation                                        | 171 | 0.1090 | 1  | 6   |
| GO:0032196 | biological process | transposition                                             | 172 | 0.1998 | 13 | 43  |
| GO:0032259 | biological process | methylation                                               | 173 | 0.1218 | 33 | 157 |
| GO:0032409 | biological process | regulation of transporter activity                        | 174 | 0.3579 | 8  | 36  |
| GO:0032502 | biological process | developmental process                                     | 175 | 0.1390 | 4  | 14  |
| GO:0032787 | biological process | monocarboxylic acid metabolic process                     | 176 | 0.2230 | 6  | 23  |
| GO:0032879 | biological process | regulation of localization                                | 177 | 0.3579 | 8  | 36  |
| GO:0033013 | biological process | tetrapyrrole metabolic process                            | 178 | 0.2285 | 8  | 33  |
| GO:0033036 | biological process | macromolecule localization                                | 179 | 0.0210 | 1  | 6   |
| GO:0033567 | biological process | DNA replication, Okazaki fragment processing              | 180 | 0.1190 | 10 | 26  |
| GO:0033865 | biological process | nucleoside bisphosphate metabolic process                 | 181 | 0.2530 | 1  | 3   |
| GO:0034248 | biological process | regulation of cellular amide metabolic process            | 182 | 0.0750 | 1  | 12  |
| GO:0034404 | biological process | nucleobase-containing small molecule biosynthetic process | 183 | 0.1719 | 18 | 67  |
| GO:0008652 | biological process | cellular amino acid biosynthetic process                  | 183 | 0.1719 | 27 | 96  |
| GO:0016053 | biological process | organic acid biosynthetic process                         | 183 | 0.1719 | 57 | 217 |
| GO:1901607 | biological process | alpha-amino acid biosynthetic process                     | 183 | 0.1719 | 25 | 81  |
| GO:0034622 | biological process | cellular macromolecular complex assembly                  | 184 | 0.0589 | 8  | 26  |
| GO:0017004 | biological process | cytochrome complex assembly                               | 184 | 0.0589 | 1  | 9   |
| GO:0033108 | biological process | mitochondrial respiratory chain complex assembly          | 184 | 0.0589 | 1  | 9   |

|            |                    |                                                                      |     |        |      |      |
|------------|--------------------|----------------------------------------------------------------------|-----|--------|------|------|
| GO:0051260 | biological process | protein homooligomerization                                          | 184 | 0.0589 | 6    | 19   |
| GO:0070897 | biological process | DNA-templated transcriptional preinitiation complex assembly         | 184 | 0.0589 | 5    | 12   |
| GO:0034641 | biological process | cellular nitrogen compound metabolic process                         | 185 | 0.1324 | 1843 | 8915 |
| GO:0034645 | biological process | cellular macromolecule biosynthetic process                          | 186 | 0.1187 | 979  | 4356 |
| GO:0034654 | biological process | nucleobase-containing compound biosynthetic process                  | 187 | 0.1226 | 694  | 3073 |
| GO:0032774 | biological process | RNA biosynthetic process                                             | 187 | 0.1226 | 484  | 1764 |
| GO:0097659 | biological process | nucleic acid-templated transcription                                 | 187 | 0.1226 | 446  | 1615 |
| GO:0034660 | biological process | ncRNA metabolic process                                              | 188 | 0.1032 | 25   | 97   |
| GO:0035556 | biological process | intracellular signal transduction                                    | 189 | 0.0963 | 3    | 8    |
| GO:0007165 | biological process | signal transduction                                                  | 189 | 0.0963 | 4    | 10   |
| GO:0035821 | biological process | modification of morphology or physiology of other organism           | 190 | 0.1610 | 228  | 810  |
| GO:0036211 | biological process | protein modification process                                         | 191 | 0.1202 | 186  | 613  |
| GO:0036260 | biological process | RNA capping                                                          | 192 | 0.1842 | 15   | 52   |
| GO:0039514 | biological process | suppression by virus of host JAK-STAT cascade                        | 193 | 0.1206 | 24   | 86   |
| GO:0039644 | biological process | suppression by virus of host NF-kappaB transcription factor activity | 194 | 0.1839 | 5    | 10   |
| GO:0019048 | biological process | modulation by virus of host morphology or physiology                 | 194 | 0.1839 | 180  | 687  |
| GO:0039548 | biological process | suppression by virus of host IRF3 activity                           | 194 | 0.1839 | 1    | 2    |
| GO:0039579 | biological process | suppression by virus of host ISG15 activity                          | 194 | 0.1839 | 5    | 10   |
| GO:0039648 | biological process | modulation by virus of host protein ubiquitination                   | 194 | 0.1839 | 27   | 79   |
| GO:0039656 | biological process | modulation by virus of host gene expression                          | 194 | 0.1839 | 27   | 94   |
| GO:0044068 | biological process | modulation by symbiont of host cellular process                      | 194 | 0.1839 | 122  | 412  |
| GO:0044359 | biological process | modulation of molecular function in other organism                   | 194 | 0.1839 | 53   | 169  |

|            |                    |                                                                                                              |     |        |     |     |
|------------|--------------------|--------------------------------------------------------------------------------------------------------------|-----|--------|-----|-----|
| GO:0044362 | biological process | negative regulation of molecular function in other organism                                                  | 194 | 0.1839 | 32  | 102 |
| GO:0044364 | biological process | disruption of cells of other organism                                                                        | 194 | 0.1839 | 29  | 148 |
| GO:0044501 | biological process | modulation of signal transduction in other organism                                                          | 194 | 0.1839 | 68  | 225 |
| GO:0051673 | biological process | membrane disruption in other organism                                                                        | 194 | 0.1839 | 47  | 104 |
| GO:0051807 | biological process | evasion or tolerance of defense response of other organism involved in symbiotic interaction                 | 194 | 0.1839 | 95  | 319 |
| GO:0051817 | biological process | modification of morphology or physiology of other organism involved in symbiotic interaction                 | 194 | 0.1839 | 227 | 791 |
| GO:0051818 | biological process | disruption of cells of other organism involved in symbiotic interaction                                      | 194 | 0.1839 | 28  | 129 |
| GO:0051833 | biological process | suppression of defenses of other organism involved in symbiotic interaction                                  | 194 | 0.1839 | 90  | 304 |
| GO:0052185 | biological process | modification of structure of other organism involved in symbiotic interaction                                | 194 | 0.1839 | 47  | 104 |
| GO:0052255 | biological process | modulation by organism of defense response of other organism involved in symbiotic interaction               | 194 | 0.1839 | 90  | 304 |
| GO:0052312 | biological process | modulation of transcription in other organism involved in symbiotic interaction                              | 194 | 0.1839 | 22  | 76  |
| GO:0052490 | biological process | negative regulation by organism of programmed cell death in other organism involved in symbiotic interaction | 194 | 0.1839 | 10  | 24  |
| GO:0052564 | biological process | response to immune response of other organism involved in symbiotic interaction                              | 194 | 0.1839 | 95  | 319 |
| GO:0039654 | biological process | fusion of virus membrane with host endosome membrane                                                         | 195 | 0.1062 | 33  | 117 |
| GO:0019064 | biological process | fusion of virus membrane with host plasma membrane                                                           | 195 | 0.1062 | 39  | 143 |
| GO:0019069 | biological process | viral capsid assembly                                                                                        | 195 | 0.1062 | 53  | 308 |

|            |                    |                                                                                    |     |        |      |      |
|------------|--------------------|------------------------------------------------------------------------------------|-----|--------|------|------|
| GO:0019073 | biological process | viral DNA genome packaging                                                         | 195 | 0.1062 | 50   | 185  |
| GO:0046755 | biological process | viral budding                                                                      | 195 | 0.1062 | 25   | 94   |
| GO:0046760 | biological process | viral budding from Golgi membrane                                                  | 195 | 0.1062 | 7    | 20   |
| GO:0046765 | biological process | viral budding from nuclear membrane                                                | 195 | 0.1062 | 12   | 61   |
| GO:0039664 | biological process | lysis of host organelle involved in viral entry into host cell                     | 196 | 0.1385 | 6    | 22   |
| GO:0039665 | biological process | permeabilization of host organelle membrane involved in viral entry into host cell | 197 | 0.0100 | 1    | 3    |
| GO:0039666 | biological process | virion attachment to host cell pilus                                               | 198 | 0.3980 | 2    | 4    |
| GO:0046813 | biological process | receptor-mediated virion attachment to host cell                                   | 198 | 0.3980 | 1    | 2    |
| GO:0039667 | biological process | viral entry into host cell via pilus retraction                                    | 199 | 0.2051 | 1    | 2    |
| GO:0009405 | biological process | pathogenesis                                                                       | 199 | 0.2051 | 32   | 137  |
| GO:0016032 | biological process | viral process                                                                      | 199 | 0.2051 | 1152 | 4827 |
| GO:0032897 | biological process | negative regulation of viral transcription                                         | 199 | 0.2051 | 7    | 36   |
| GO:0035890 | biological process | exit from host                                                                     | 199 | 0.2051 | 128  | 613  |
| GO:0043901 | biological process | negative regulation of multi-organism process                                      | 199 | 0.2051 | 15   | 72   |
| GO:0050792 | biological process | regulation of viral process                                                        | 199 | 0.2051 | 39   | 169  |
| GO:0051701 | biological process | interaction with host                                                              | 199 | 0.2051 | 463  | 1942 |
| GO:0051828 | biological process | entry into other organism involved in symbiotic interaction                        | 199 | 0.2051 | 155  | 589  |
| GO:0052192 | biological process | movement in environment of other organism involved in symbiotic interaction        | 199 | 0.2051 | 164  | 818  |
| GO:0075136 | biological process | response to host                                                                   | 199 | 0.2051 | 98   | 335  |
| GO:1903900 | biological process | regulation of viral life cycle                                                     | 199 | 0.2051 | 8    | 36   |
| GO:0039678 | biological process | viral genome ejection through host cell envelope                                   | 200 | 0.2386 | 34   | 187  |
| GO:0039687 | biological process | viral DNA strand displacement replication                                          | 201 | 0.1455 | 2    | 4    |
| GO:0039702 | biological process | viral budding via host ESCRT complex                                               | 202 | 0.1675 | 2    | 4    |
| GO:0019072 | biological process | viral genome packaging                                                             | 202 | 0.1675 | 84   | 336  |

|            |                    |                                                     |     |        |      |      |
|------------|--------------------|-----------------------------------------------------|-----|--------|------|------|
| GO:0040011 | biological process | locomotion                                          | 203 | 0.1708 | 173  | 841  |
| GO:0040012 | biological process | regulation of locomotion                            | 204 | 0.3579 | 8    | 36   |
| GO:0042135 | biological process | neurotransmitter catabolic process                  | 205 | 0.2995 | 1    | 3    |
| GO:0042136 | biological process | neurotransmitter biosynthetic process               | 205 | 0.2995 | 19   | 58   |
| GO:0042221 | biological process | response to chemical                                | 206 | 0.1095 | 4    | 22   |
| GO:0042357 | biological process | thiamine diphosphate metabolic process              | 207 | 0.3225 | 1    | 2    |
| GO:0000096 | biological process | sulfur amino acid metabolic process                 | 207 | 0.3225 | 1    | 3    |
| GO:0006213 | biological process | pyrimidine nucleoside metabolic process             | 207 | 0.3225 | 1    | 2    |
| GO:0006220 | biological process | pyrimidine nucleotide metabolic process             | 207 | 0.3225 | 144  | 759  |
| GO:0006221 | biological process | pyrimidine nucleotide biosynthetic process          | 207 | 0.3225 | 96   | 540  |
| GO:0044272 | biological process | sulfur compound biosynthetic process                | 207 | 0.3225 | 2    | 5    |
| GO:0072528 | biological process | pyrimidine-containing compound biosynthetic process | 207 | 0.3225 | 98   | 545  |
| GO:0042398 | biological process | cellular modified amino acid biosynthetic process   | 208 | 0.1557 | 48   | 177  |
| GO:0042440 | biological process | pigment metabolic process                           | 209 | 0.2850 | 1    | 5    |
| GO:0042558 | biological process | pteridine-containing compound metabolic process     | 210 | 0.1566 | 49   | 178  |
| GO:0042737 | biological process | drug catabolic process                              | 211 | 0.2303 | 7    | 21   |
| GO:0042886 | biological process | amide transport                                     | 212 | 0.0210 | 1    | 6    |
| GO:0043038 | biological process | amino acid activation                               | 213 | 0.0936 | 7    | 21   |
| GO:0043086 | biological process | negative regulation of catalytic activity           | 214 | 0.0923 | 3    | 8    |
| GO:0043170 | biological process | macromolecule metabolic process                     | 215 | 0.1328 | 1754 | 8370 |
| GO:0043412 | biological process | macromolecule modification                          | 216 | 0.1219 | 229  | 809  |
| GO:0043543 | biological process | protein acylation                                   | 217 | 0.3058 | 4    | 10   |
| GO:0043603 | biological process | cellular amide metabolic process                    | 218 | 0.1655 | 55   | 201  |
| GO:0043648 | biological process | dicarboxylic acid metabolic process                 | 219 | 0.0480 | 1    | 5    |
| GO:0043900 | biological process | regulation of multi-organism process                | 220 | 0.1689 | 40   | 171  |
| GO:0043902 | biological process | positive regulation of multi-organism process       | 221 | 0.0900 | 1    | 2    |

|            |                    |                                                      |     |        |      |      |
|------------|--------------------|------------------------------------------------------|-----|--------|------|------|
| GO:0043933 | biological process | macromolecular complex subunit organization          | 222 | 0.1486 | 64   | 156  |
| GO:0043934 | biological process | sporulation                                          | 223 | 0.2370 | 1    | 3    |
| GO:0044036 | biological process | cell wall macromolecule metabolic process            | 224 | 0.1932 | 72   | 369  |
| GO:0044092 | biological process | negative regulation of molecular function            | 225 | 0.1607 | 43   | 146  |
| GO:0050790 | biological process | regulation of catalytic activity                     | 225 | 0.1607 | 29   | 87   |
| GO:0051336 | biological process | regulation of hydrolase activity                     | 225 | 0.1607 | 5    | 13   |
| GO:0051338 | biological process | regulation of transferase activity                   | 225 | 0.1607 | 24   | 74   |
| GO:0044237 | biological process | cellular metabolic process                           | 226 | 0.1368 | 2010 | 9679 |
| GO:0044238 | biological process | primary metabolic process                            | 227 | 0.1337 | 1923 | 9214 |
| GO:0044249 | biological process | cellular biosynthetic process                        | 228 | 0.1281 | 1265 | 5912 |
| GO:0044260 | biological process | cellular macromolecule metabolic process             | 229 | 0.1322 | 1554 | 7346 |
| GO:0044262 | biological process | cellular carbohydrate metabolic process              | 230 | 0.1515 | 2    | 6    |
| GO:0044267 | biological process | cellular protein metabolic process                   | 231 | 0.1210 | 187  | 615  |
| GO:0044271 | biological process | cellular nitrogen compound biosynthetic process      | 232 | 0.1344 | 762  | 3324 |
| GO:0044281 | biological process | small molecule metabolic process                     | 233 | 0.1492 | 316  | 1757 |
| GO:0044282 | biological process | small molecule catabolic process                     | 234 | 0.1943 | 2    | 12   |
| GO:0009057 | biological process | macromolecule catabolic process                      | 234 | 0.1943 | 138  | 854  |
| GO:0044248 | biological process | cellular catabolic process                           | 234 | 0.1943 | 105  | 491  |
| GO:0044283 | biological process | small molecule biosynthetic process                  | 235 | 0.1754 | 79   | 297  |
| GO:0044419 | biological process | interspecies interaction between organisms           | 236 | 0.1143 | 1197 | 5025 |
| GO:0019058 | biological process | viral life cycle                                     | 236 | 0.1143 | 37   | 148  |
| GO:0019068 | biological process | virion assembly                                      | 236 | 0.1143 | 28   | 144  |
| GO:0019079 | biological process | viral genome replication                             | 236 | 0.1143 | 420  | 1514 |
| GO:0044403 | biological process | symbiosis, encompassing mutualism through parasitism | 236 | 0.1143 | 1153 | 4829 |
| GO:0044764 | biological process | multi-organism cellular process                      | 236 | 0.1143 | 75   | 283  |

|            |                    |                                                          |     |        |      |      |
|------------|--------------------|----------------------------------------------------------|-----|--------|------|------|
| GO:0044531 | biological process | modulation of programmed cell death in other organism    | 237 | 0.1325 | 34   | 112  |
| GO:0045229 | biological process | external encapsulating structure organization            | 238 | 0.2740 | 1    | 2    |
| GO:0046116 | biological process | queuosine metabolic process                              | 239 | 0.2065 | 2    | 8    |
| GO:0046349 | biological process | amino sugar biosynthetic process                         | 240 | 0.1915 | 2    | 5    |
| GO:0006047 | biological process | UDP-N-acetylglucosamine metabolic process                | 240 | 0.1915 | 2    | 5    |
| GO:0046348 | biological process | amino sugar catabolic process                            | 240 | 0.1915 | 6    | 18   |
| GO:1901071 | biological process | glucosamine-containing compound metabolic process        | 240 | 0.1915 | 29   | 91   |
| GO:0046385 | biological process | deoxyribose phosphate biosynthetic process               | 241 | 0.1582 | 84   | 484  |
| GO:0046434 | biological process | organophosphate catabolic process                        | 242 | 0.1915 | 15   | 57   |
| GO:0046483 | biological process | heterocycle metabolic process                            | 243 | 0.1317 | 1829 | 8871 |
| GO:0046486 | biological process | glycerolipid metabolic process                           | 244 | 0.0230 | 1    | 3    |
| GO:0046753 | biological process | non-lytic viral release                                  | 245 | 0.2064 | 7    | 15   |
| GO:0046903 | biological process | secretion                                                | 246 | 0.1950 | 2    | 4    |
| GO:0048017 | biological process | inositol lipid-mediated signaling                        | 247 | 0.0230 | 1    | 3    |
| GO:0048518 | biological process | positive regulation of biological process                | 248 | 0.1457 | 77   | 297  |
| GO:0048519 | biological process | negative regulation of biological process                | 249 | 0.1744 | 175  | 646  |
| GO:0048522 | biological process | positive regulation of cellular process                  | 250 | 0.1176 | 59   | 201  |
| GO:0010942 | biological process | positive regulation of cell death                        | 250 | 0.1176 | 1    | 2    |
| GO:0031325 | biological process | positive regulation of cellular metabolic process        | 250 | 0.1176 | 58   | 199  |
| GO:0048583 | biological process | regulation of response to stimulus                       | 251 | 0.1493 | 99   | 329  |
| GO:0048646 | biological process | anatomical structure formation involved in morphogenesis | 252 | 0.2370 | 1    | 3    |
| GO:0048878 | biological process | chemical homeostasis                                     | 253 | 0.0636 | 3    | 14   |
| GO:0060249 | biological process | anatomical structure homeostasis                         | 253 | 0.0636 | 2    | 31   |
| GO:0050684 | biological process | regulation of mRNA processing                            | 254 | 0.1944 | 6    | 21   |
| GO:0061013 | biological process | regulation of mRNA catabolic process                     | 254 | 0.1944 | 10   | 28   |



|            |                    |                                                  |     |        |     |      |
|------------|--------------------|--------------------------------------------------|-----|--------|-----|------|
| GO:1903313 | biological process | positive regulation of mRNA metabolic process    | 254 | 0.1944 | 10  | 28   |
| GO:0050794 | biological process | regulation of cellular process                   | 255 | 0.1540 | 410 | 1612 |
| GO:0050789 | biological process | regulation of biological process                 | 255 | 0.1540 | 457 | 1799 |
| GO:0050865 | biological process | regulation of cell activation                    | 256 | 0.2485 | 2   | 7    |
| GO:0050896 | biological process | response to stimulus                             | 257 | 0.1465 | 314 | 1488 |
| GO:0051052 | biological process | regulation of DNA metabolic process              | 258 | 0.0967 | 38  | 150  |
| GO:0051128 | biological process | regulation of cellular component organization    | 259 | 0.2848 | 4   | 10   |
| GO:0051156 | biological process | glucose 6-phosphate metabolic process            | 260 | 0.1735 | 2   | 13   |
| GO:0051174 | biological process | regulation of phosphorus metabolic process       | 261 | 0.3270 | 2   | 5    |
| GO:0051179 | biological process | localization                                     | 262 | 0.1198 | 126 | 708  |
| GO:0051186 | biological process | cofactor metabolic process                       | 263 | 0.1765 | 74  | 366  |
| GO:0051188 | biological process | cofactor biosynthetic process                    | 264 | 0.1565 | 67  | 336  |
| GO:0006732 | biological process | coenzyme metabolic process                       | 264 | 0.1565 | 64  | 326  |
| GO:0006733 | biological process | oxidoreduction coenzyme metabolic process        | 264 | 0.1565 | 13  | 142  |
| GO:0009108 | biological process | coenzyme biosynthetic process                    | 264 | 0.1565 | 60  | 308  |
| GO:0051202 | biological process | phytochromobilin metabolic process               | 265 | 0.1297 | 3   | 15   |
| GO:0051246 | biological process | regulation of protein metabolic process          | 266 | 0.1455 | 30  | 99   |
| GO:0051248 | biological process | negative regulation of protein metabolic process | 267 | 0.0909 | 4   | 20   |
| GO:0045861 | biological process | negative regulation of proteolysis               | 267 | 0.0909 | 3   | 8    |
| GO:0052548 | biological process | regulation of endopeptidase activity             | 267 | 0.0909 | 3   | 8    |
| GO:0051259 | biological process | protein oligomerization                          | 268 | 0.1517 | 56  | 130  |
| GO:0051301 | biological process | cell division                                    | 269 | 0.4140 | 1   | 2    |
| GO:0051604 | biological process | protein maturation                               | 270 | 0.1973 | 18  | 66   |
| GO:0051606 | biological process | detection of stimulus                            | 271 | 0.1190 | 1   | 2    |
| GO:0051641 | biological process | cellular localization                            | 272 | 0.1043 | 43  | 197  |
| GO:0051649 | biological process | establishment of localization in cell            | 273 | 0.1053 | 43  | 197  |
| GO:0051169 | biological process | nuclear transport                                | 273 | 0.1053 | 42  | 191  |

|            |                    |                                                                                                 |     |        |      |      |
|------------|--------------------|-------------------------------------------------------------------------------------------------|-----|--------|------|------|
| GO:0051704 | biological process | multi-organism process                                                                          | 274 | 0.1300 | 1258 | 5237 |
| GO:0051716 | biological process | cellular response to stimulus                                                                   | 275 | 0.1460 | 179  | 996  |
| GO:0051726 | biological process | regulation of cell cycle                                                                        | 276 | 0.1811 | 17   | 60   |
| GO:0051814 | biological process | movement in other organism involved in symbiotic interaction                                    | 277 | 0.1116 | 36   | 205  |
| GO:0051821 | biological process | dissemination or transmission of organism from other organism involved in symbiotic interaction | 278 | 0.2005 | 6    | 17   |
| GO:0052203 | biological process | modulation of catalytic activity in other organism involved in symbiotic interaction            | 279 | 0.0958 | 22   | 69   |
| GO:0039523 | biological process | suppression by virus of host RNA polymerase II activity                                         | 279 | 0.0958 | 1    | 2    |
| GO:0039563 | biological process | suppression by virus of host STAT1 activity                                                     | 279 | 0.0958 | 3    | 7    |
| GO:0039724 | biological process | suppression by virus of host IKBKE activity                                                     | 279 | 0.0958 | 1    | 2    |
| GO:0055085 | biological process | transmembrane transport                                                                         | 280 | 0.1745 | 2    | 32   |
| GO:0055086 | biological process | nucleobase-containing small molecule metabolic process                                          | 281 | 0.1491 | 239  | 1460 |
| GO:0055114 | biological process | oxidation-reduction process                                                                     | 282 | 0.1741 | 27   | 149  |
| GO:0060759 | biological process | regulation of response to cytokine stimulus                                                     | 283 | 0.1536 | 68   | 225  |
| GO:0060968 | biological process | regulation of gene silencing                                                                    | 284 | 0.1938 | 18   | 96   |
| GO:0061024 | biological process | membrane organization                                                                           | 285 | 0.0989 | 73   | 262  |
| GO:0065007 | biological process | biological regulation                                                                           | 286 | 0.1553 | 483  | 1907 |
| GO:0065008 | biological process | regulation of biological quality                                                                | 287 | 0.1559 | 83   | 391  |
| GO:0065009 | biological process | regulation of molecular function                                                                | 288 | 0.1742 | 68   | 223  |
| GO:0070085 | biological process | glycosylation                                                                                   | 289 | 0.0654 | 5    | 14   |
| GO:0070647 | biological process | protein modification by small protein conjugation or removal                                    | 290 | 0.1148 | 6    | 22   |
| GO:0071103 | biological process | DNA conformation change                                                                         | 291 | 0.0785 | 100  | 531  |
| GO:0006323 | biological process | DNA packaging                                                                                   | 291 | 0.0785 | 52   | 278  |

|            |                    |                                                   |     |        |      |       |
|------------|--------------------|---------------------------------------------------|-----|--------|------|-------|
| GO:0032200 | biological process | telomere organization                             | 291 | 0.0785 | 2    | 31    |
| GO:0032392 | biological process | DNA geometric change                              | 291 | 0.0785 | 5    | 25    |
| GO:0071702 | biological process | organic substance transport                       | 292 | 0.1164 | 18   | 109   |
| GO:0071704 | biological process | organic substance metabolic process               | 293 | 0.1367 | 2134 | 10355 |
| GO:0071705 | biological process | nitrogen compound transport                       | 294 | 0.1066 | 16   | 105   |
| GO:0071824 | biological process | protein-DNA complex subunit organization          | 295 | 0.1353 | 6    | 14    |
| GO:0071840 | biological process | cellular component organization or biogenesis     | 296 | 0.1241 | 243  | 994   |
| GO:0071897 | biological process | DNA biosynthetic process                          | 297 | 0.1430 | 35   | 177   |
| GO:0072330 | biological process | monocarboxylic acid biosynthetic process          | 298 | 0.2038 | 5    | 21    |
| GO:0006631 | biological process | fatty acid metabolic process                      | 298 | 0.2038 | 1    | 2     |
| GO:0072521 | biological process | purine-containing compound metabolic process      | 299 | 0.2333 | 11   | 57    |
| GO:0072522 | biological process | purine-containing compound biosynthetic process   | 300 | 0.1923 | 10   | 54    |
| GO:0009119 | biological process | ribonucleoside metabolic process                  | 300 | 0.1923 | 4    | 13    |
| GO:0009150 | biological process | purine ribonucleotide metabolic process           | 300 | 0.1923 | 4    | 20    |
| GO:0042278 | biological process | purine nucleoside metabolic process               | 300 | 0.1923 | 2    | 5     |
| GO:0042451 | biological process | purine nucleoside biosynthetic process            | 300 | 0.1923 | 1    | 2     |
| GO:0072524 | biological process | pyridine-containing compound metabolic process    | 301 | 0.1339 | 13   | 142   |
| GO:0072525 | biological process | pyridine-containing compound biosynthetic process | 302 | 0.1267 | 11   | 129   |
| GO:0019674 | biological process | NAD metabolic process                             | 302 | 0.1267 | 11   | 129   |
| GO:0072527 | biological process | pyrimidine-containing compound metabolic process  | 303 | 0.1469 | 146  | 764   |
| GO:0072583 | biological process | clathrin-dependent endocytosis                    | 304 | 0.1790 | 1    | 2     |
| GO:0072593 | biological process | reactive oxygen species metabolic process         | 305 | 0.0965 | 2    | 13    |
| GO:0090304 | biological process | nucleic acid metabolic process                    | 306 | 0.1275 | 1542 | 7247  |
| GO:0097164 | biological process | ammonium ion metabolic process                    | 307 | 0.2069 | 7    | 25    |
| GO:0098003 | biological process | viral tail assembly                               | 308 | 0.2250 | 24   | 98    |

|            |                    |                                                                                 |     |        |      |      |
|------------|--------------------|---------------------------------------------------------------------------------|-----|--------|------|------|
| GO:0098657 | biological process | import into cell                                                                | 309 | 0.0731 | 10   | 110  |
| GO:0099000 | biological process | viral genome ejection through host cell envelope,<br>contractile tail mechanism | 310 | 0.2239 | 24   | 116  |
| GO:0099002 | biological process | viral genome ejection through host cell envelope,<br>short tail mechanism       | 310 | 0.2239 | 10   | 71   |
| GO:0099018 | biological process | restriction-modification system evasion by virus                                | 311 | 0.0980 | 1    | 9    |
| GO:0099045 | biological process | viral extrusion                                                                 | 312 | 0.2808 | 1    | 2    |
| GO:0046761 | biological process | viral budding from plasma membrane                                              | 312 | 0.2808 | 6    | 13   |
| GO:0099046 | biological process | clearance of foreign intracellular nucleic acids                                | 313 | 0.2287 | 2    | 7    |
| GO:0009617 | biological process | response to bacterium                                                           | 313 | 0.2287 | 17   | 75   |
| GO:0009620 | biological process | response to fungus                                                              | 313 | 0.2287 | 1    | 3    |
| GO:0052173 | biological process | response to defenses of other organism involved in<br>symbiotic interaction     | 313 | 0.2287 | 98   | 335  |
| GO:0098542 | biological process | defense response to other organism                                              | 313 | 0.2287 | 17   | 75   |
| GO:1901135 | biological process | carbohydrate derivative metabolic process                                       | 314 | 0.1538 | 362  | 2134 |
| GO:1901136 | biological process | carbohydrate derivative catabolic process                                       | 315 | 0.1656 | 131  | 838  |
| GO:1901184 | biological process | regulation of ERBB signaling pathway                                            | 316 | 0.3270 | 2    | 5    |
| GO:1901360 | biological process | organic cyclic compound metabolic process                                       | 317 | 0.1317 | 1836 | 8912 |
| GO:1901361 | biological process | organic cyclic compound catabolic process                                       | 318 | 0.1769 | 27   | 105  |
| GO:1901362 | biological process | organic cyclic compound biosynthetic process                                    | 319 | 0.1327 | 753  | 3307 |
| GO:1901564 | biological process | organonitrogen compound metabolic process                                       | 320 | 0.1482 | 636  | 3024 |
| GO:1901565 | biological process | organonitrogen compound catabolic process                                       | 321 | 0.1614 | 125  | 815  |
| GO:1901566 | biological process | organonitrogen compound biosynthetic process                                    | 322 | 0.1616 | 191  | 1003 |
| GO:1901568 | biological process | fatty acid derivative metabolic process                                         | 323 | 0.1750 | 1    | 2    |
| GO:1901571 | biological process | fatty acid derivative transport                                                 | 324 | 0.1950 | 2    | 4    |
| GO:1901576 | biological process | organic substance biosynthetic process                                          | 325 | 0.1282 | 1274 | 5950 |
| GO:1901605 | biological process | alpha-amino acid metabolic process                                              | 326 | 0.1537 | 29   | 99   |
| GO:0006520 | biological process | cellular amino acid metabolic process                                           | 326 | 0.1537 | 39   | 138  |

|            |                    |                                                                            |     |        |      |       |
|------------|--------------------|----------------------------------------------------------------------------|-----|--------|------|-------|
| GO:0009064 | biological process | glutamine family amino acid metabolic process                              | 326 | 0.1537 | 7    | 32    |
| GO:1901657 | biological process | glycosyl compound metabolic process                                        | 327 | 0.1539 | 20   | 138   |
| GO:1901137 | biological process | carbohydrate derivative biosynthetic process                               | 327 | 0.1539 | 139  | 860   |
| GO:1901659 | biological process | glycosyl compound biosynthetic process                                     | 328 | 0.1940 | 3    | 10    |
| GO:1902579 | biological process | multi-organism localization                                                | 329 | 0.1157 | 111  | 626   |
| GO:1902586 | biological process | multi-organism intercellular transport                                     | 330 | 0.0901 | 36   | 205   |
| GO:0075519 | biological process | microtubule-dependent intracellular transport of viral material            | 330 | 0.0901 | 23   | 93    |
| GO:0075606 | biological process | transport of viral material towards nucleus                                | 330 | 0.0901 | 23   | 93    |
| GO:0075733 | biological process | intracellular transport of virus                                           | 330 | 0.0901 | 49   | 227   |
| GO:1902581 | biological process | multi-organism cellular localization                                       | 330 | 0.0901 | 42   | 191   |
| GO:1903311 | biological process | regulation of mRNA metabolic process                                       | 331 | 0.1948 | 16   | 49    |
| GO:1903320 | biological process | regulation of protein modification by small protein conjugation or removal | 332 | 0.1279 | 22   | 69    |
| GO:0005575 | cellular component | cellular component                                                         | 333 | 0.2036 | 4461 | 17222 |
| GO:0005576 | cellular component | extracellular region                                                       | 334 | 0.1400 | 67   | 267   |
| GO:0009295 | cellular component | nucleoid                                                                   | 335 | 0.1580 | 1    | 7     |
| GO:0016020 | cellular component | membrane                                                                   | 336 | 0.1150 | 193  | 696   |
| GO:0019012 | cellular component | virion                                                                     | 337 | 0.1398 | 57   | 261   |
| GO:0019029 | cellular component | helical viral capsid                                                       | 338 | 0.0604 | 11   | 50    |
| GO:0019867 | cellular component | outer membrane                                                             | 339 | 0.2223 | 13   | 51    |

|            |                    |                                                                |     |        |     |      |
|------------|--------------------|----------------------------------------------------------------|-----|--------|-----|------|
| GO:0032991 | cellular component | macromolecular complex                                         | 340 | 0.1969 | 7   | 40   |
| GO:0039615 | cellular component | T=1 icosahedral viral capsid                                   | 341 | 0.0655 | 29  | 133  |
| GO:0039617 | cellular component | T=3 icosahedral viral capsid                                   | 341 | 0.0655 | 1   | 3    |
| GO:0039620 | cellular component | T=7 icosahedral viral capsid                                   | 341 | 0.0655 | 6   | 90   |
| GO:0039621 | cellular component | T=13 icosahedral viral capsid                                  | 341 | 0.0655 | 2   | 4    |
| GO:0039622 | cellular component | T=16 icosahedral viral capsid                                  | 341 | 0.0655 | 2   | 7    |
| GO:0039623 | cellular component | T=25 icosahedral viral capsid                                  | 341 | 0.0655 | 2   | 23   |
| GO:0039624 | cellular component | viral outer capsid                                             | 341 | 0.0655 | 3   | 7    |
| GO:0039625 | cellular component | viral inner capsid                                             | 341 | 0.0655 | 1   | 4    |
| GO:0044172 | cellular component | host cell endoplasmic reticulum-Golgi intermediate compartment | 342 | 0.1294 | 7   | 15   |
| GO:0030430 | cellular component | host cell cytoplasm                                            | 342 | 0.1294 | 228 | 1016 |
| GO:0033643 | cellular component | host cell part                                                 | 342 | 0.1294 | 771 | 3276 |
| GO:0033646 | cellular component | host intracellular part                                        | 342 | 0.1294 | 598 | 2535 |
| GO:0033647 | cellular component | host intracellular organelle                                   | 342 | 0.1294 | 410 | 1830 |
| GO:0033648 | cellular component | host intracellular membrane-bounded organelle                  | 342 | 0.1294 | 409 | 1827 |

|            |                    |                                           |     |        |     |      |
|------------|--------------------|-------------------------------------------|-----|--------|-----|------|
| GO:0033650 | cellular component | host cell mitochondrion                   | 342 | 0.1294 | 1   | 8    |
| GO:0033655 | cellular component | host cell cytoplasm part                  | 342 | 0.1294 | 100 | 284  |
| GO:0042025 | cellular component | host cell nucleus                         | 342 | 0.1294 | 383 | 1752 |
| GO:0044162 | cellular component | host cell cytoplasmic vesicle membrane    | 342 | 0.1294 | 47  | 104  |
| GO:0044165 | cellular component | host cell endoplasmic reticulum           | 342 | 0.1294 | 2   | 7    |
| GO:0044174 | cellular component | host cell endosome                        | 342 | 0.1294 | 2   | 4    |
| GO:0044177 | cellular component | host cell Golgi apparatus                 | 342 | 0.1294 | 21  | 57   |
| GO:0044216 | cellular component | other organism cell                       | 342 | 0.1294 | 19  | 79   |
| GO:0044217 | cellular component | other organism part                       | 342 | 0.1294 | 794 | 3382 |
| GO:0044220 | cellular component | host cell perinuclear region of cytoplasm | 342 | 0.1294 | 26  | 102  |
| GO:0044279 | cellular component | other organism membrane                   | 342 | 0.1294 | 261 | 990  |
| GO:0044219 | cellular component | host cell plasmodesma                     | 343 | 0.1058 | 6   | 13   |
| GO:0020002 | cellular component | host cell plasma membrane                 | 343 | 0.1058 | 82  | 361  |
| GO:0044156 | cellular component | host cell junction                        | 343 | 0.1058 | 11  | 30   |
| GO:0044166 | cellular component | host cell endoplasmic reticulum lumen     | 343 | 0.1058 | 1   | 2    |

|            |                    |                                                 |     |        |    |     |
|------------|--------------------|-------------------------------------------------|-----|--------|----|-----|
| GO:0044167 | cellular component | host cell endoplasmic reticulum membrane        | 343 | 0.1058 | 26 | 90  |
| GO:0044168 | cellular component | host cell rough endoplasmic reticulum           | 343 | 0.1058 | 1  | 3   |
| GO:0044175 | cellular component | host cell endosome membrane                     | 343 | 0.1058 | 25 | 111 |
| GO:0044178 | cellular component | host cell Golgi membrane                        | 343 | 0.1058 | 29 | 106 |
| GO:0044185 | cellular component | host cell late endosome membrane                | 343 | 0.1058 | 2  | 4   |
| GO:0044200 | cellular component | host cell nuclear membrane                      | 343 | 0.1058 | 29 | 122 |
| GO:0044385 | cellular component | integral to membrane of host cell               | 343 | 0.1058 | 50 | 112 |
| GO:0044386 | cellular component | integral to host endoplasmic reticulum membrane | 343 | 0.1058 | 3  | 8   |
| GO:0044228 | cellular component | host cell surface                               | 344 | 0.0170 | 1  | 3   |
| GO:0044229 | cellular component | host cell periplasmic space                     | 345 | 0.1562 | 3  | 31  |
| GO:0044094 | cellular component | host cell nuclear part                          | 345 | 0.1562 | 1  | 2   |
| GO:0044383 | cellular component | host chromosome                                 | 346 | 0.0450 | 1  | 3   |
| GO:0044384 | cellular component | host outer membrane                             | 347 | 0.2015 | 2  | 25  |
| GO:0044421 | cellular component | extracellular region part                       | 348 | 0.0816 | 15 | 64  |
| GO:0005615 | cellular component | extracellular space                             | 348 | 0.0816 | 9  | 40  |



|            |                    |                                        |     |        |      |       |
|------------|--------------------|----------------------------------------|-----|--------|------|-------|
| GO:0031012 | cellular component | extracellular matrix                   | 348 | 0.0816 | 6    | 24    |
| GO:0044425 | cellular component | membrane part                          | 349 | 0.2373 | 3117 | 11330 |
| GO:0046729 | cellular component | viral procapsid                        | 350 | 0.0370 | 1    | 4     |
| GO:0098021 | cellular component | viral capsid, decoration               | 351 | 0.2733 | 7    | 45    |
| GO:0098025 | cellular component | virus tail, baseplate                  | 352 | 0.1198 | 72   | 343   |
| GO:0019013 | cellular component | viral nucleocapsid                     | 352 | 0.1198 | 41   | 165   |
| GO:0019028 | cellular component | viral capsid                           | 352 | 0.1198 | 708  | 2896  |
| GO:0019030 | cellular component | icosahedral viral capsid               | 352 | 0.1198 | 55   | 290   |
| GO:0019033 | cellular component | viral tegument                         | 352 | 0.1198 | 56   | 218   |
| GO:0036338 | cellular component | viral membrane                         | 352 | 0.1198 | 205  | 774   |
| GO:0044423 | cellular component | virion part                            | 352 | 0.1198 | 1080 | 4429  |
| GO:0055036 | cellular component | virion membrane                        | 352 | 0.1198 | 118  | 413   |
| GO:0000150 | molecular function | recombinase activity                   | 353 | 0.1338 | 28   | 162   |
| GO:0000217 | molecular function | DNA secondary structure binding        | 354 | 0.2038 | 4    | 16    |
| GO:0000287 | molecular function | magnesium ion binding                  | 355 | 0.1582 | 61   | 356   |
| GO:0001067 | molecular function | regulatory region nucleic acid binding | 356 | 0.2100 | 1    | 2     |
| GO:0001653 | molecular function | peptide receptor activity              | 357 | 0.1817 | 3    | 6     |

|            |                    |                                                                                               |     |        |      |       |
|------------|--------------------|-----------------------------------------------------------------------------------------------|-----|--------|------|-------|
| GO:0001848 | molecular function | complement binding                                                                            | 358 | 0.2530 | 2    | 5     |
| GO:0001883 | molecular function | purine nucleoside binding                                                                     | 359 | 0.1621 | 3    | 27    |
| GO:0001882 | molecular function | nucleoside binding                                                                            | 359 | 0.1621 | 13   | 71    |
| GO:0032553 | molecular function | ribonucleotide binding                                                                        | 359 | 0.1621 | 948  | 4728  |
| GO:0002161 | molecular function | aminoacyl-tRNA editing activity                                                               | 360 | 0.0610 | 1    | 3     |
| GO:0003674 | molecular function | molecular function                                                                            | 361 | 0.1408 | 5381 | 25017 |
| GO:0003676 | molecular function | nucleic acid binding                                                                          | 362 | 0.1391 | 2430 | 10776 |
| GO:0003677 | molecular function | DNA binding                                                                                   | 363 | 0.1440 | 1599 | 7503  |
| GO:0003684 | molecular function | damaged DNA binding                                                                           | 364 | 0.1213 | 3    | 9     |
| GO:0003690 | molecular function | double-stranded DNA binding                                                                   | 365 | 0.1100 | 26   | 116   |
| GO:0003697 | molecular function | single-stranded DNA binding                                                                   | 366 | 0.1455 | 95   | 777   |
| GO:0003723 | molecular function | RNA binding                                                                                   | 367 | 0.1199 | 484  | 1683  |
| GO:0003724 | molecular function | RNA helicase activity                                                                         | 368 | 0.1190 | 170  | 511   |
| GO:0003678 | molecular function | DNA helicase activity                                                                         | 368 | 0.1190 | 52   | 559   |
| GO:0070035 | molecular function | purine NTP-dependent helicase activity                                                        | 368 | 0.1190 | 70   | 287   |
| GO:0003725 | molecular function | double-stranded RNA binding                                                                   | 369 | 0.1087 | 20   | 84    |
| GO:0003727 | molecular function | single-stranded RNA binding                                                                   | 370 | 0.0885 | 2    | 4     |
| GO:0003729 | molecular function | mRNA binding                                                                                  | 371 | 0.2080 | 2    | 6     |
| GO:0003735 | molecular function | structural constituent of ribosome                                                            | 372 | 0.2670 | 1    | 2     |
| GO:0003824 | molecular function | catalytic activity                                                                            | 373 | 0.1404 | 3506 | 16251 |
| GO:0003829 | molecular function | beta-1,3-galactosyl-O-glycosyl-glycoprotein beta-1,6-N-acetylglucosaminyltransferase activity | 374 | 0.0170 | 1    | 4     |
| GO:0003830 | molecular function | beta-1,4-mannosylglycoprotein 4-beta-N-acetylglucosaminyltransferase activity                 | 375 | 0.0180 | 1    | 4     |
| GO:0003899 | molecular function | DNA-directed 5'-3' RNA polymerase activity                                                    | 376 | 0.1189 | 106  | 596   |
| GO:0003896 | molecular function | DNA primase activity                                                                          | 376 | 0.1189 | 24   | 249   |
| GO:0003968 | molecular function | RNA-directed 5'-3' RNA polymerase activity                                                    | 376 | 0.1189 | 362  | 1224  |

|            |                    |                                                         |     |        |     |      |
|------------|--------------------|---------------------------------------------------------|-----|--------|-----|------|
| GO:0034061 | molecular function | DNA polymerase activity                                 | 376 | 0.1189 | 233 | 825  |
| GO:0097747 | molecular function | RNA polymerase activity                                 | 376 | 0.1189 | 468 | 1820 |
| GO:0003916 | molecular function | DNA topoisomerase activity                              | 377 | 0.1442 | 44  | 230  |
| GO:0003917 | molecular function | DNA topoisomerase type I activity                       | 378 | 0.1523 | 11  | 39   |
| GO:0061505 | molecular function | DNA topoisomerase II activity                           | 378 | 0.1523 | 31  | 185  |
| GO:0003924 | molecular function | GTPase activity                                         | 379 | 0.0887 | 3   | 10   |
| GO:0003937 | molecular function | IMP cyclohydrolase activity                             | 380 | 0.1557 | 2   | 5    |
| GO:0003933 | molecular function | GTP cyclohydrolase activity                             | 380 | 0.1557 | 6   | 27   |
| GO:0003950 | molecular function | NAD+ ADP-ribosyltransferase activity                    | 381 | 0.4050 | 1   | 2    |
| GO:0003952 | molecular function | NAD+ synthase (glutamine-hydrolyzing) activity          | 382 | 0.0210 | 1   | 4    |
| GO:0003964 | molecular function | RNA-directed DNA polymerase activity                    | 383 | 0.1734 | 5   | 13   |
| GO:0003887 | molecular function | DNA-directed DNA polymerase activity                    | 383 | 0.1734 | 228 | 812  |
| GO:0003972 | molecular function | RNA ligase (ATP) activity                               | 384 | 0.1500 | 25  | 129  |
| GO:0003909 | molecular function | DNA ligase activity                                     | 384 | 0.1500 | 42  | 247  |
| GO:0003910 | molecular function | DNA ligase (ATP) activity                               | 384 | 0.1500 | 34  | 197  |
| GO:0003911 | molecular function | DNA ligase (NAD+) activity                              | 384 | 0.1500 | 7   | 38   |
| GO:0008452 | molecular function | RNA ligase activity                                     | 384 | 0.1500 | 32  | 173  |
| GO:0004014 | molecular function | adenosylmethionine decarboxylase activity               | 385 | 0.2253 | 6   | 21   |
| GO:0004019 | molecular function | adenylosuccinate synthase activity                      | 386 | 0.3830 | 1   | 19   |
| GO:0004040 | molecular function | amidase activity                                        | 387 | 0.1872 | 9   | 30   |
| GO:0004045 | molecular function | aminoacyl-tRNA hydrolase activity                       | 388 | 0.2422 | 5   | 26   |
| GO:0004066 | molecular function | asparagine synthase (glutamine-hydrolyzing)<br>activity | 389 | 0.2480 | 4   | 17   |
| GO:0004089 | molecular function | carbonate dehydratase activity                          | 390 | 0.0160 | 1   | 14   |
| GO:0004132 | molecular function | dCMP deaminase activity                                 | 391 | 0.1352 | 15  | 84   |
| GO:0004000 | molecular function | adenosine deaminase activity                            | 391 | 0.1352 | 1   | 2    |
| GO:0019238 | molecular function | cyclohydrolase activity                                 | 391 | 0.1352 | 8   | 32   |

|            |                    |                                                                                                                    |     |        |     |      |
|------------|--------------------|--------------------------------------------------------------------------------------------------------------------|-----|--------|-----|------|
| GO:0004150 | molecular function | dihydroneopterin aldolase activity                                                                                 | 392 | 0.1380 | 1   | 3    |
| GO:0004170 | molecular function | dUTP diphosphatase activity                                                                                        | 393 | 0.1125 | 34  | 154  |
| GO:0004176 | molecular function | ATP-dependent peptidase activity                                                                                   | 394 | 0.0665 | 2   | 6    |
| GO:0004180 | molecular function | carboxypeptidase activity                                                                                          | 395 | 0.0532 | 2   | 9    |
| GO:0008235 | molecular function | metalloexopeptidase activity                                                                                       | 395 | 0.0532 | 1   | 7    |
| GO:0070008 | molecular function | serine-type exopeptidase activity                                                                                  | 395 | 0.0532 | 3   | 6    |
| GO:0004222 | molecular function | metalloendopeptidase activity                                                                                      | 396 | 0.1425 | 15  | 54   |
| GO:0004345 | molecular function | glucose-6-phosphate dehydrogenase activity                                                                         | 397 | 0.0170 | 1   | 11   |
| GO:0004386 | molecular function | helicase activity                                                                                                  | 398 | 0.1321 | 360 | 1656 |
| GO:0004392 | molecular function | heme oxygenase (decyclizing) activity                                                                              | 399 | 0.2850 | 1   | 5    |
| GO:0004482 | molecular function | mRNA (guanine-N7-)-methyltransferase activity                                                                      | 400 | 0.1140 | 51  | 195  |
| GO:0004484 | molecular function | mRNA guanylyltransferase activity                                                                                  | 401 | 0.1167 | 13  | 50   |
| GO:0008193 | molecular function | tRNA guanylyltransferase activity                                                                                  | 401 | 0.1167 | 3   | 13   |
| GO:0004497 | molecular function | monooxygenase activity                                                                                             | 402 | 0.2890 | 4   | 8    |
| GO:0004514 | molecular function | nicotinate-nucleotide diphosphorylase<br>(carboxylating) activity                                                  | 403 | 0.1373 | 10  | 125  |
| GO:0004518 | molecular function | nuclease activity                                                                                                  | 404 | 0.1566 | 605 | 2349 |
| GO:0042578 | molecular function | phosphoric ester hydrolase activity                                                                                | 404 | 0.1566 | 53  | 226  |
| GO:0004532 | molecular function | exoribonuclease activity                                                                                           | 405 | 0.1595 | 6   | 13   |
| GO:0004521 | molecular function | endoribonuclease activity                                                                                          | 405 | 0.1595 | 30  | 131  |
| GO:0004523 | molecular function | RNA-DNA hybrid ribonuclease activity                                                                               | 405 | 0.1595 | 19  | 88   |
| GO:0008408 | molecular function | 3'-5' exonuclease activity                                                                                         | 405 | 0.1595 | 38  | 144  |
| GO:0016796 | molecular function | exonuclease activity, active with either ribo- or<br>deoxyribonucleic acids and producing 5'-<br>phosphomonoesters | 405 | 0.1595 | 10  | 32   |
| GO:0016891 | molecular function | endoribonuclease activity, producing 5'-<br>phosphomonoesters                                                      | 405 | 0.1595 | 27  | 125  |
| GO:0032296 | molecular function | double-stranded RNA-specific ribonuclease activity                                                                 | 405 | 0.1595 | 8   | 37   |

|            |                    |                                                                  |     |        |     |      |
|------------|--------------------|------------------------------------------------------------------|-----|--------|-----|------|
| GO:0004536 | molecular function | deoxyribonuclease activity                                       | 406 | 0.1598 | 108 | 391  |
| GO:0004519 | molecular function | endonuclease activity                                            | 406 | 0.1598 | 446 | 1702 |
| GO:0004527 | molecular function | exonuclease activity                                             | 406 | 0.1598 | 107 | 390  |
| GO:0004540 | molecular function | ribonuclease activity                                            | 406 | 0.1598 | 36  | 144  |
| GO:0004550 | molecular function | nucleoside diphosphate kinase activity                           | 407 | 0.1308 | 1   | 2    |
| GO:0004138 | molecular function | deoxyguanosine kinase activity                                   | 407 | 0.1308 | 1   | 2    |
| GO:0004797 | molecular function | thymidine kinase activity                                        | 407 | 0.1308 | 39  | 191  |
| GO:0019136 | molecular function | deoxynucleoside kinase activity                                  | 407 | 0.1308 | 40  | 193  |
| GO:0019206 | molecular function | nucleoside kinase activity                                       | 407 | 0.1308 | 48  | 220  |
| GO:0004553 | molecular function | hydrolase activity, hydrolyzing O-glycosyl compounds             | 408 | 0.1213 | 104 | 483  |
| GO:0016799 | molecular function | hydrolase activity, hydrolyzing N-glycosyl compounds             | 408 | 0.1213 | 19  | 92   |
| GO:0019104 | molecular function | DNA N-glycosylase activity                                       | 408 | 0.1213 | 13  | 54   |
| GO:0004568 | molecular function | chitinase activity                                               | 409 | 0.1945 | 6   | 18   |
| GO:0004588 | molecular function | orotate phosphoribosyltransferase activity                       | 410 | 0.1380 | 1   | 2    |
| GO:0004597 | molecular function | peptide-aspartate beta-dioxygenase activity                      | 411 | 0.3048 | 4   | 21   |
| GO:0004602 | molecular function | glutathione peroxidase activity                                  | 412 | 0.0260 | 1   | 4    |
| GO:0004609 | molecular function | phosphatidylserine decarboxylase activity                        | 413 | 0.2984 | 1   | 3    |
| GO:0016831 | molecular function | carboxy-lyase activity                                           | 413 | 0.2984 | 8   | 29   |
| GO:0016832 | molecular function | aldehyde-lyase activity                                          | 413 | 0.2984 | 8   | 46   |
| GO:0004616 | molecular function | phosphogluconate dehydrogenase (decarboxylating) activity        | 414 | 0.1735 | 2   | 13   |
| GO:0004623 | molecular function | phospholipase A2 activity                                        | 415 | 0.1950 | 2   | 4    |
| GO:0004629 | molecular function | phospholipase C activity                                         | 416 | 0.0130 | 1   | 3    |
| GO:0004639 | molecular function | phosphoribosylaminoimidazolesuccinocarboxamide synthase activity | 417 | 0.2885 | 4   | 13   |

|            |                    |                                                                                   |     |        |     |      |
|------------|--------------------|-----------------------------------------------------------------------------------|-----|--------|-----|------|
| GO:0004643 | molecular function | phosphoribosylaminoimidazolecarboxamide<br>formyltransferase activity             | 418 | 0.2117 | 2   | 5    |
| GO:0003864 | molecular function | 3-methyl-2-oxobutanoate<br>hydroxymethyltransferase activity                      | 418 | 0.2117 | 1   | 4    |
| GO:0004372 | molecular function | glycine hydroxymethyltransferase activity                                         | 418 | 0.2117 | 1   | 2    |
| GO:0004649 | molecular function | poly(ADP-ribose) glycohydrolase activity                                          | 419 | 0.1823 | 3   | 7    |
| GO:0004657 | molecular function | proline dehydrogenase activity                                                    | 420 | 0.0180 | 1   | 9    |
| GO:0004666 | molecular function | prostaglandin-endoperoxide synthase activity                                      | 421 | 0.1750 | 1   | 2    |
| GO:0004674 | molecular function | protein serine/threonine kinase activity                                          | 422 | 0.1061 | 21  | 76   |
| GO:0004672 | molecular function | protein kinase activity                                                           | 422 | 0.1061 | 86  | 391  |
| GO:0004722 | molecular function | protein serine/threonine phosphatase activity                                     | 423 | 0.0433 | 3   | 9    |
| GO:0004788 | molecular function | thiamine diphosphokinase activity                                                 | 424 | 0.3652 | 1   | 2    |
| GO:0003848 | molecular function | 2-amino-4-hydroxy-6-<br>hydroxymethyldihydropteridine diphosphokinase<br>activity | 424 | 0.3652 | 1   | 3    |
| GO:0004749 | molecular function | ribose phosphate diphosphokinase activity                                         | 424 | 0.3652 | 11  | 100  |
| GO:0004803 | molecular function | transposase activity                                                              | 425 | 0.2166 | 10  | 26   |
| GO:0004814 | molecular function | arginine-tRNA ligase activity                                                     | 426 | 0.0070 | 1   | 3    |
| GO:0004816 | molecular function | asparagine-tRNA ligase activity                                                   | 427 | 0.0720 | 1   | 2    |
| GO:0004822 | molecular function | isoleucine-tRNA ligase activity                                                   | 428 | 0.0610 | 1   | 3    |
| GO:0004825 | molecular function | methionine-tRNA ligase activity                                                   | 429 | 0.1090 | 1   | 2    |
| GO:0004857 | molecular function | enzyme inhibitor activity                                                         | 430 | 0.2151 | 4   | 17   |
| GO:0030234 | molecular function | enzyme regulator activity                                                         | 430 | 0.2151 | 14  | 67   |
| GO:0061134 | molecular function | peptidase regulator activity                                                      | 430 | 0.2151 | 2   | 12   |
| GO:0004896 | molecular function | cytokine receptor activity                                                        | 431 | 0.1392 | 3   | 6    |
| GO:0004930 | molecular function | G-protein coupled receptor activity                                               | 431 | 0.1392 | 19  | 59   |
| GO:0005102 | molecular function | receptor binding                                                                  | 432 | 0.1540 | 15  | 42   |
| GO:0005198 | molecular function | structural molecule activity                                                      | 433 | 0.1119 | 592 | 2423 |

|            |                    |                                                        |     |        |      |       |
|------------|--------------------|--------------------------------------------------------|-----|--------|------|-------|
| GO:0005215 | molecular function | transporter activity                                   | 434 | 0.1943 | 87   | 293   |
| GO:0005488 | molecular function | binding                                                | 435 | 0.1383 | 3383 | 15711 |
| GO:0005506 | molecular function | iron ion binding                                       | 436 | 0.1421 | 38   | 144   |
| GO:0005507 | molecular function | copper ion binding                                     | 437 | 0.1670 | 4    | 22    |
| GO:0005509 | molecular function | calcium ion binding                                    | 438 | 0.1555 | 2    | 5     |
| GO:0005515 | molecular function | protein binding                                        | 439 | 0.1292 | 118  | 440   |
| GO:0005521 | molecular function | lamin binding                                          | 440 | 0.2016 | 5    | 13    |
| GO:0008061 | molecular function | chitin binding                                         | 441 | 0.1472 | 25   | 78    |
| GO:0008079 | molecular function | translation termination factor activity                | 442 | 0.1807 | 1    | 5     |
| GO:0003743 | molecular function | translation initiation factor activity                 | 442 | 0.1807 | 12   | 35    |
| GO:0003746 | molecular function | translation elongation factor activity                 | 442 | 0.1807 | 11   | 38    |
| GO:0008081 | molecular function | phosphoric diester hydrolase activity                  | 443 | 0.1494 | 5    | 26    |
| GO:0004721 | molecular function | phosphoprotein phosphatase activity                    | 443 | 0.1494 | 26   | 109   |
| GO:0016791 | molecular function | phosphatase activity                                   | 443 | 0.1494 | 48   | 200   |
| GO:0008092 | molecular function | cytoskeletal protein binding                           | 444 | 0.0866 | 5    | 11    |
| GO:0008094 | molecular function | DNA-dependent ATPase activity                          | 445 | 0.1435 | 66   | 465   |
| GO:0008134 | molecular function | transcription factor binding                           | 446 | 0.1108 | 4    | 10    |
| GO:0008135 | molecular function | translation factor activity, RNA binding               | 447 | 0.1578 | 24   | 78    |
| GO:0008138 | molecular function | protein tyrosine/serine/threonine phosphatase activity | 448 | 0.1329 | 17   | 77    |
| GO:0004725 | molecular function | protein tyrosine phosphatase activity                  | 448 | 0.1329 | 19   | 79    |
| GO:0008144 | molecular function | drug binding                                           | 449 | 0.1229 | 971  | 4796  |
| GO:0008172 | molecular function | S-methyltransferase activity                           | 450 | 0.0380 | 1    | 2     |
| GO:0008174 | molecular function | mRNA methyltransferase activity                        | 451 | 0.1092 | 87   | 351   |
| GO:0008194 | molecular function | UDP-glycosyltransferase activity                       | 452 | 0.0175 | 2    | 8     |
| GO:0008199 | molecular function | ferric iron binding                                    | 453 | 0.1207 | 3    | 14    |
| GO:0008233 | molecular function | peptidase activity                                     | 454 | 0.1365 | 410  | 1470  |

|            |                    |                                                                |     |        |     |      |
|------------|--------------------|----------------------------------------------------------------|-----|--------|-----|------|
| GO:0008234 | molecular function | cysteine-type peptidase activity                               | 455 | 0.1197 | 258 | 798  |
| GO:0008238 | molecular function | exopeptidase activity                                          | 456 | 0.1444 | 12  | 30   |
| GO:0004175 | molecular function | endopeptidase activity                                         | 456 | 0.1444 | 273 | 931  |
| GO:0008237 | molecular function | metallopeptidase activity                                      | 456 | 0.1444 | 19  | 68   |
| GO:0070011 | molecular function | peptidase activity, acting on L-amino acid peptides            | 456 | 0.1444 | 348 | 1195 |
| GO:0008242 | molecular function | omega peptidase activity                                       | 457 | 0.1982 | 6   | 13   |
| GO:0004177 | molecular function | aminopeptidase activity                                        | 457 | 0.1982 | 1   | 2    |
| GO:0008252 | molecular function | nucleotidase activity                                          | 458 | 0.1955 | 11  | 45   |
| GO:0008270 | molecular function | zinc ion binding                                               | 459 | 0.1564 | 147 | 788  |
| GO:0008309 | molecular function | double-stranded DNA exodeoxyribonuclease activity              | 460 | 0.0390 | 1   | 5    |
| GO:0008324 | molecular function | cation transmembrane transporter activity                      | 461 | 0.1520 | 2   | 4    |
| GO:0015075 | molecular function | ion transmembrane transporter activity                         | 461 | 0.1520 | 49  | 108  |
| GO:0015077 | molecular function | monovalent inorganic cation transmembrane transporter activity | 461 | 0.1520 | 1   | 2    |
| GO:0022804 | molecular function | active transmembrane transporter activity                      | 461 | 0.1520 | 1   | 6    |
| GO:0008373 | molecular function | sialyltransferase activity                                     | 462 | 0.0850 | 1   | 3    |
| GO:0008374 | molecular function | O-acyltransferase activity                                     | 463 | 0.1695 | 2   | 5    |
| GO:0008409 | molecular function | 5'-3' exonuclease activity                                     | 464 | 0.0390 | 1   | 5    |
| GO:0008417 | molecular function | fucosyltransferase activity                                    | 465 | 0.0563 | 4   | 11   |
| GO:0008446 | molecular function | GDP-mannose 4,6-dehydratase activity                           | 466 | 0.0110 | 1   | 22   |
| GO:0008565 | molecular function | protein transporter activity                                   | 467 | 0.0803 | 6   | 30   |
| GO:0008821 | molecular function | crossover junction endodeoxyribonuclease activity              | 468 | 0.0449 | 3   | 33   |
| GO:0003906 | molecular function | DNA-(apurinic or apyrimidinic site) lyase activity             | 468 | 0.0449 | 2   | 6    |
| GO:0004531 | molecular function | deoxyribonuclease II activity                                  | 468 | 0.0449 | 1   | 4    |
| GO:0016836 | molecular function | hydro-lyase activity                                           | 468 | 0.0449 | 2   | 36   |
| GO:0016889 | molecular function | endodeoxyribonuclease activity, producing 3'-phosphomonoesters | 468 | 0.0449 | 4   | 37   |



|            |                    |                                                                                 |     |        |    |     |
|------------|--------------------|---------------------------------------------------------------------------------|-----|--------|----|-----|
| GO:0016892 | molecular function | endoribonuclease activity, producing 3'-phosphomonoesters                       | 468 | 0.0449 | 3  | 6   |
| GO:0008829 | molecular function | dCTP deaminase activity                                                         | 469 | 0.0756 | 5  | 24  |
| GO:0008833 | molecular function | deoxyribonuclease IV (phage-T4-induced) activity                                | 470 | 0.2723 | 18 | 73  |
| GO:0008879 | molecular function | glucose-1-phosphate thymidyltransferase activity                                | 471 | 0.0290 | 1  | 4   |
| GO:0008889 | molecular function | glycerophosphodiester phosphodiesterase activity                                | 472 | 0.2208 | 4  | 23  |
| GO:0008933 | molecular function | lytic transglycosylase activity                                                 | 473 | 0.1900 | 1  | 2   |
| GO:0003796 | molecular function | lysozyme activity                                                               | 473 | 0.1900 | 67 | 353 |
| GO:0008745 | molecular function | N-acetylmuramoyl-L-alanine amidase activity                                     | 473 | 0.1900 | 47 | 422 |
| GO:0008962 | molecular function | phosphatidylglycerophosphatase activity                                         | 474 | 0.1740 | 1  | 2   |
| GO:0008998 | molecular function | ribonucleoside-triphosphate reductase activity                                  | 475 | 0.1129 | 19 | 112 |
| GO:0061731 | molecular function | ribonucleoside-diphosphate reductase activity                                   | 475 | 0.1129 | 33 | 222 |
| GO:0009007 | molecular function | site-specific DNA-methyltransferase (adenine-specific) activity                 | 476 | 0.1102 | 39 | 239 |
| GO:0003886 | molecular function | DNA (cytosine-5-)-methyltransferase activity                                    | 476 | 0.1102 | 5  | 28  |
| GO:0015667 | molecular function | site-specific DNA-methyltransferase (cytosine-N4-specific) activity             | 476 | 0.1102 | 5  | 17  |
| GO:0009008 | molecular function | DNA-methyltransferase activity                                                  | 477 | 0.1276 | 49 | 284 |
| GO:0009055 | molecular function | electron carrier activity                                                       | 478 | 0.1781 | 55 | 318 |
| GO:0009378 | molecular function | four-way junction helicase activity                                             | 479 | 0.1051 | 1  | 2   |
| GO:0004003 | molecular function | ATP-dependent DNA helicase activity                                             | 479 | 0.1051 | 8  | 76  |
| GO:0010181 | molecular function | FMN binding                                                                     | 480 | 0.1880 | 4  | 36  |
| GO:0015036 | molecular function | disulfide oxidoreductase activity                                               | 481 | 0.1351 | 39 | 206 |
| GO:0016670 | molecular function | oxidoreductase activity, acting on a sulfur group of donors, oxygen as acceptor | 481 | 0.1351 | 22 | 85  |
| GO:0015318 | molecular function | inorganic solute uptake transmembrane transporter activity                      | 482 | 0.1535 | 50 | 114 |
| GO:0015666 | molecular function | restriction endodeoxyribonuclease activity                                      | 483 | 0.1999 | 2  | 7   |

|            |                    |                                                                                                              |     |        |     |      |
|------------|--------------------|--------------------------------------------------------------------------------------------------------------|-----|--------|-----|------|
| GO:0004520 | molecular function | endodeoxyribonuclease activity                                                                               | 483 | 0.1999 | 99  | 355  |
| GO:0004529 | molecular function | exodeoxyribonuclease activity                                                                                | 483 | 0.1999 | 4   | 19   |
| GO:0008855 | molecular function | exodeoxyribonuclease VII activity                                                                            | 483 | 0.1999 | 3   | 14   |
| GO:0016888 | molecular function | endodeoxyribonuclease activity, producing 5'-phosphomonoesters                                               | 483 | 0.1999 | 86  | 289  |
| GO:0016893 | molecular function | endonuclease activity, active with either ribo- or deoxyribonucleic acids and producing 5'-phosphomonoesters | 483 | 0.1999 | 112 | 412  |
| GO:0015929 | molecular function | hexosaminidase activity                                                                                      | 484 | 0.2740 | 1   | 2    |
| GO:0015932 | molecular function | nucleobase-containing compound transmembrane transporter activity                                            | 485 | 0.1658 | 9   | 32   |
| GO:0016209 | molecular function | antioxidant activity                                                                                         | 486 | 0.1050 | 8   | 31   |
| GO:0016229 | molecular function | steroid dehydrogenase activity                                                                               | 487 | 0.1166 | 5   | 26   |
| GO:0016298 | molecular function | lipase activity                                                                                              | 488 | 0.1343 | 3   | 7    |
| GO:0016410 | molecular function | N-acyltransferase activity                                                                                   | 489 | 0.2057 | 7   | 20   |
| GO:0008080 | molecular function | N-acetyltransferase activity                                                                                 | 489 | 0.2057 | 2   | 5    |
| GO:0016407 | molecular function | acetyltransferase activity                                                                                   | 489 | 0.2057 | 4   | 13   |
| GO:0016747 | molecular function | transferase activity, transferring acyl groups other than amino-acyl groups                                  | 489 | 0.2057 | 15  | 42   |
| GO:0016412 | molecular function | serine O-acyltransferase activity                                                                            | 490 | 0.2670 | 1   | 3    |
| GO:0016413 | molecular function | O-acetyltransferase activity                                                                                 | 490 | 0.2670 | 1   | 3    |
| GO:0016491 | molecular function | oxidoreductase activity                                                                                      | 491 | 0.1476 | 344 | 1780 |
| GO:0016597 | molecular function | amino acid binding                                                                                           | 492 | 0.1240 | 1   | 3    |
| GO:0016614 | molecular function | oxidoreductase activity, acting on CH-OH group of donors                                                     | 493 | 0.1084 | 16  | 78   |
| GO:0016616 | molecular function | oxidoreductase activity, acting on the CH-OH group of donors, NAD or NADP as acceptor                        | 494 | 0.1143 | 12  | 65   |

|            |                    |                                                                                               |     |        |    |     |
|------------|--------------------|-----------------------------------------------------------------------------------------------|-----|--------|----|-----|
| GO:0016627 | molecular function | oxidoreductase activity, acting on the CH-CH group of donors                                  | 495 | 0.1590 | 4  | 17  |
| GO:0016628 | molecular function | oxidoreductase activity, acting on the CH-CH group of donors, NAD or NADP as acceptor         | 496 | 0.2470 | 1  | 2   |
| GO:0016636 | molecular function | oxidoreductase activity, acting on the CH-CH group of donors, iron-sulfur protein as acceptor | 497 | 0.1297 | 3  | 15  |
| GO:0016638 | molecular function | oxidoreductase activity, acting on the CH-NH2 group of donors                                 | 498 | 0.4450 | 1  | 3   |
| GO:0016645 | molecular function | oxidoreductase activity, acting on the CH-NH group of donors                                  | 499 | 0.1661 | 43 | 160 |
| GO:0016646 | molecular function | oxidoreductase activity, acting on the CH-NH group of donors, NAD or NADP as acceptor         | 500 | 0.1687 | 42 | 151 |
| GO:0004146 | molecular function | dihydrofolate reductase activity                                                              | 500 | 0.1687 | 40 | 143 |
| GO:0016651 | molecular function | oxidoreductase activity, acting on NAD(P)H                                                    | 501 | 0.1843 | 3  | 10  |
| GO:0016657 | molecular function | oxidoreductase activity, acting on NAD(P)H, nitrogenous group as acceptor                     | 502 | 0.1622 | 2  | 8   |
| GO:0003954 | molecular function | NADH dehydrogenase activity                                                                   | 502 | 0.1622 | 1  | 2   |
| GO:0016655 | molecular function | oxidoreductase activity, acting on NAD(P)H, quinone or similar compound as acceptor           | 502 | 0.1622 | 1  | 2   |
| GO:0016661 | molecular function | oxidoreductase activity, acting on other nitrogenous compounds as donors                      | 503 | 0.3140 | 1  | 3   |
| GO:0016667 | molecular function | oxidoreductase activity, acting on a sulfur group of donors                                   | 504 | 0.1435 | 61 | 291 |
| GO:0016679 | molecular function | oxidoreductase activity, acting on diphenols and related substances as donors                 | 505 | 0.0805 | 2  | 19  |
| GO:0016684 | molecular function | oxidoreductase activity, acting on peroxide as acceptor                                       | 506 | 0.1303 | 3  | 10  |
| GO:0016701 | molecular function | oxidoreductase activity, acting on single donors with incorporation of molecular oxygen       | 507 | 0.4385 | 2  | 4   |

|            |                    |                                                                                                                                                                                                   |     |        |      |      |
|------------|--------------------|---------------------------------------------------------------------------------------------------------------------------------------------------------------------------------------------------|-----|--------|------|------|
| GO:0016705 | molecular function | oxidoreductase activity, acting on paired donors, with incorporation or reduction of molecular oxygen                                                                                             | 508 | 0.1332 | 40   | 156  |
| GO:0016706 | molecular function | oxidoreductase activity, acting on paired donors, with incorporation or reduction of molecular oxygen, 2-oxoglutarate as one donor, and incorporation of one atom each of oxygen into both donors | 509 | 0.2340 | 6    | 28   |
| GO:0016714 | molecular function | oxidoreductase activity, acting on paired donors, with incorporation or reduction of molecular oxygen, reduced pteridine as one donor, and incorporation of one atom of oxygen                    | 510 | 0.1580 | 1    | 2    |
| GO:0016717 | molecular function | oxidoreductase activity, acting on paired donors, with oxidation of a pair of donors resulting in the reduction of molecular oxygen to two molecules of water                                     | 511 | 0.0700 | 1    | 2    |
| GO:0016721 | molecular function | oxidoreductase activity, acting on superoxide radicals as acceptor                                                                                                                                | 512 | 0.0898 | 5    | 21   |
| GO:0016722 | molecular function | oxidoreductase activity, oxidizing metal ions                                                                                                                                                     | 513 | 0.1550 | 1    | 2    |
| GO:0016725 | molecular function | oxidoreductase activity, acting on CH or CH2 groups                                                                                                                                               | 514 | 0.1108 | 52   | 334  |
| GO:0016740 | molecular function | transferase activity                                                                                                                                                                              | 515 | 0.1233 | 1378 | 5826 |
| GO:0016741 | molecular function | transferase activity, transferring one-carbon groups                                                                                                                                              | 516 | 0.1317 | 340  | 1709 |
| GO:0016742 | molecular function | hydroxymethyl-, formyl- and related transferase activity                                                                                                                                          | 517 | 0.1313 | 5    | 15   |
| GO:0008168 | molecular function | methyltransferase activity                                                                                                                                                                        | 517 | 0.1313 | 334  | 1691 |
| GO:0008170 | molecular function | N-methyltransferase activity                                                                                                                                                                      | 517 | 0.1313 | 103  | 452  |
| GO:0008171 | molecular function | O-methyltransferase activity                                                                                                                                                                      | 517 | 0.1313 | 40   | 144  |
| GO:0008173 | molecular function | RNA methyltransferase activity                                                                                                                                                                    | 517 | 0.1313 | 89   | 356  |

|            |                    |                                                                             |     |        |      |      |
|------------|--------------------|-----------------------------------------------------------------------------|-----|--------|------|------|
| GO:0008757 | molecular function | S-adenosylmethionine-dependent methyltransferase activity                   | 517 | 0.1313 | 136  | 635  |
| GO:0016743 | molecular function | carboxyl- or carbamoyltransferase activity                                  | 518 | 0.1240 | 1    | 3    |
| GO:0016746 | molecular function | transferase activity, transferring acyl groups                              | 519 | 0.1932 | 17   | 46   |
| GO:0016757 | molecular function | transferase activity, transferring glycosyl groups                          | 520 | 0.1560 | 47   | 247  |
| GO:0016763 | molecular function | transferase activity, transferring pentosyl groups                          | 521 | 0.1586 | 18   | 160  |
| GO:0016758 | molecular function | transferase activity, transferring hexosyl groups                           | 521 | 0.1586 | 16   | 49   |
| GO:0016765 | molecular function | transferase activity, transferring alkyl or aryl (other than methyl) groups | 522 | 0.0640 | 1    | 10   |
| GO:0016769 | molecular function | transferase activity, transferring nitrogenous groups                       | 523 | 0.1923 | 3    | 29   |
| GO:0016772 | molecular function | transferase activity, transferring phosphorus-containing groups             | 524 | 0.1166 | 986  | 3864 |
| GO:0016773 | molecular function | phosphotransferase activity, alcohol group as acceptor                      | 525 | 0.1044 | 89   | 402  |
| GO:0016301 | molecular function | kinase activity                                                             | 525 | 0.1044 | 195  | 838  |
| GO:0016775 | molecular function | phosphotransferase activity, nitrogenous group as acceptor                  | 526 | 0.1190 | 1    | 2    |
| GO:0016776 | molecular function | phosphotransferase activity, phosphate group as acceptor                    | 527 | 0.1581 | 7    | 17   |
| GO:0016778 | molecular function | diphosphotransferase activity                                               | 528 | 0.2016 | 13   | 105  |
| GO:0016779 | molecular function | nucleotidyltransferase activity                                             | 529 | 0.1148 | 776  | 2918 |
| GO:0016780 | molecular function | phosphotransferase activity, for other substituted phosphate groups         | 530 | 0.1590 | 1    | 3    |
| GO:0016787 | molecular function | hydrolase activity                                                          | 531 | 0.1447 | 1867 | 8429 |
| GO:0016788 | molecular function | hydrolase activity, acting on ester bonds                                   | 532 | 0.1604 | 703  | 2742 |
| GO:0016798 | molecular function | hydrolase activity, acting on glycosyl bonds                                | 533 | 0.1703 | 127  | 586  |
| GO:0016801 | molecular function | hydrolase activity, acting on ether bonds                                   | 534 | 0.2670 | 1    | 2    |

|            |                    |                                                                                           |     |        |     |      |
|------------|--------------------|-------------------------------------------------------------------------------------------|-----|--------|-----|------|
| GO:0016810 | molecular function | hydrolase activity, acting on carbon-nitrogen (but not peptide) bonds                     | 535 | 0.1383 | 89  | 604  |
| GO:0016813 | molecular function | hydrolase activity, acting on carbon-nitrogen (but not peptide) bonds, in linear amidines | 536 | 0.0960 | 1   | 4    |
| GO:0016814 | molecular function | hydrolase activity, acting on carbon-nitrogen (but not peptide) bonds, in cyclic amidines | 537 | 0.1316 | 29  | 142  |
| GO:0016811 | molecular function | hydrolase activity, acting on carbon-nitrogen (but not peptide) bonds, in linear amides   | 537 | 0.1316 | 56  | 452  |
| GO:0016817 | molecular function | hydrolase activity, acting on acid anhydrides                                             | 538 | 0.1244 | 621 | 2833 |
| GO:0016829 | molecular function | lyase activity                                                                            | 539 | 0.2158 | 37  | 188  |
| GO:0016830 | molecular function | carbon-carbon lyase activity                                                              | 540 | 0.2085 | 16  | 75   |
| GO:0016835 | molecular function | carbon-oxygen lyase activity                                                              | 541 | 0.0760 | 3   | 41   |
| GO:0016838 | molecular function | carbon-oxygen lyase activity, acting on phosphates                                        | 542 | 0.2010 | 1   | 5    |
| GO:0016853 | molecular function | isomerase activity                                                                        | 543 | 0.1439 | 53  | 253  |
| GO:0016854 | molecular function | racemase and epimerase activity                                                           | 544 | 0.0700 | 1   | 3    |
| GO:0016859 | molecular function | cis-trans isomerase activity                                                              | 545 | 0.0360 | 1   | 2    |
| GO:0016860 | molecular function | intramolecular oxidoreductase activity                                                    | 546 | 0.2580 | 1   | 2    |
| GO:0016866 | molecular function | intramolecular transferase activity                                                       | 547 | 0.0240 | 1   | 4    |
| GO:0016874 | molecular function | ligase activity                                                                           | 548 | 0.1516 | 126 | 675  |
| GO:0016875 | molecular function | ligase activity, forming carbon-oxygen bonds                                              | 549 | 0.1865 | 14  | 48   |
| GO:0016879 | molecular function | ligase activity, forming carbon-nitrogen bonds                                            | 549 | 0.1865 | 19  | 101  |
| GO:0016880 | molecular function | acid-ammonia (or amide) ligase activity                                                   | 550 | 0.0170 | 1   | 3    |
| GO:0016881 | molecular function | acid-amino acid ligase activity                                                           | 551 | 0.2090 | 6   | 18   |
| GO:0016884 | molecular function | carbon-nitrogen ligase activity, with glutamine as amido-N-donor                          | 551 | 0.2090 | 9   | 40   |
| GO:0016882 | molecular function | cyclo-ligase activity                                                                     | 552 | 0.0430 | 1   | 13   |
| GO:0016886 | molecular function | ligase activity, forming phosphoric ester bonds                                           | 553 | 0.1417 | 74  | 420  |
| GO:0016887 | molecular function | ATPase activity                                                                           | 554 | 0.1284 | 186 | 894  |

|            |                    |                                                                                                              |     |        |     |      |
|------------|--------------------|--------------------------------------------------------------------------------------------------------------|-----|--------|-----|------|
| GO:0016462 | molecular function | pyrophosphatase activity                                                                                     | 554 | 0.1284 | 503 | 2400 |
| GO:0016818 | molecular function | hydrolase activity, acting on acid anhydrides, in phosphorus-containing anhydrides                           | 554 | 0.1284 | 600 | 2742 |
| GO:0017111 | molecular function | nucleoside-triphosphatase activity                                                                           | 554 | 0.1284 | 467 | 2242 |
| GO:0042623 | molecular function | ATPase activity, coupled                                                                                     | 554 | 0.1284 | 130 | 682  |
| GO:0016894 | molecular function | endonuclease activity, active with either ribo- or deoxyribonucleic acids and producing 3'-phosphomonoesters | 555 | 0.0541 | 7   | 43   |
| GO:0016903 | molecular function | oxidoreductase activity, acting on the aldehyde or oxo group of donors                                       | 556 | 0.1580 | 1   | 2    |
| GO:0016977 | molecular function | chitosanase activity                                                                                         | 557 | 0.0250 | 1   | 5    |
| GO:0016987 | molecular function | sigma factor activity                                                                                        | 558 | 0.2228 | 4   | 14   |
| GO:0016997 | molecular function | alpha-sialidase activity                                                                                     | 559 | 0.0830 | 10  | 36   |
| GO:0017060 | molecular function | 3-galactosyl-N-acetylglucosaminide 4-alpha-L-fucosyltransferase activity                                     | 560 | 0.1110 | 1   | 2    |
| GO:0017076 | molecular function | purine nucleotide binding                                                                                    | 561 | 0.1223 | 944 | 4692 |
| GO:0017171 | molecular function | serine hydrolase activity                                                                                    | 562 | 0.1254 | 63  | 301  |
| GO:0019001 | molecular function | guanyl nucleotide binding                                                                                    | 563 | 0.2133 | 3   | 27   |
| GO:0019107 | molecular function | myristoyltransferase activity                                                                                | 564 | 0.2574 | 5   | 15   |
| GO:0019200 | molecular function | carbohydrate kinase activity                                                                                 | 565 | 0.1400 | 1   | 7    |
| GO:0019205 | molecular function | nucleobase-containing compound kinase activity                                                               | 566 | 0.1303 | 55  | 237  |
| GO:0019239 | molecular function | deaminase activity                                                                                           | 567 | 0.1425 | 21  | 110  |
| GO:0019783 | molecular function | ubiquitin-like protein-specific protease activity                                                            | 568 | 0.1557 | 14  | 48   |
| GO:0004197 | molecular function | cysteine-type endopeptidase activity                                                                         | 568 | 0.1557 | 192 | 566  |
| GO:0019784 | molecular function | NEDD8-specific protease activity                                                                             | 569 | 0.0647 | 3   | 16   |
| GO:0019787 | molecular function | ubiquitin-like protein transferase activity                                                                  | 570 | 0.0653 | 7   | 27   |
| GO:0019838 | molecular function | growth factor binding                                                                                        | 571 | 0.0950 | 2   | 11   |
| GO:0019842 | molecular function | vitamin binding                                                                                              | 572 | 0.1148 | 33  | 163  |

|            |                    |                                                                        |     |        |      |      |
|------------|--------------------|------------------------------------------------------------------------|-----|--------|------|------|
| GO:0019899 | molecular function | enzyme binding                                                         | 573 | 0.1065 | 2    | 5    |
| GO:0019904 | molecular function | protein domain specific binding                                        | 574 | 0.1798 | 18   | 62   |
| GO:0019955 | molecular function | cytokine binding                                                       | 575 | 0.1475 | 4    | 17   |
| GO:0020037 | molecular function | heme binding                                                           | 576 | 0.1740 | 7    | 19   |
| GO:0022803 | molecular function | passive transmembrane transporter activity                             | 577 | 0.2062 | 66   | 215  |
| GO:0022838 | molecular function | substrate-specific channel activity                                    | 578 | 0.1537 | 47   | 104  |
| GO:0022857 | molecular function | transmembrane transporter activity                                     | 579 | 0.2028 | 81   | 263  |
| GO:0030165 | molecular function | PDZ domain binding                                                     | 580 | 0.1590 | 1    | 2    |
| GO:0030246 | molecular function | carbohydrate binding                                                   | 581 | 0.1239 | 35   | 130  |
| GO:0030337 | molecular function | DNA polymerase processivity factor activity                            | 582 | 0.0607 | 10   | 50   |
| GO:0030545 | molecular function | receptor regulator activity                                            | 583 | 0.1198 | 11   | 33   |
| GO:0030554 | molecular function | adenyl nucleotide binding                                              | 584 | 0.1220 | 941  | 4665 |
| GO:0030597 | molecular function | RNA glycosylase activity                                               | 585 | 0.0750 | 1    | 12   |
| GO:0031072 | molecular function | heat shock protein binding                                             | 586 | 0.0150 | 2    | 7    |
| GO:0031127 | molecular function | alpha-(1,2)-fucosyltransferase activity                                | 587 | 0.0450 | 2    | 6    |
| GO:0031419 | molecular function | cobalamin binding                                                      | 588 | 0.0060 | 1    | 23   |
| GO:0031423 | molecular function | hexon binding                                                          | 589 | 0.0318 | 6    | 46   |
| GO:0033170 | molecular function | protein-DNA loading ATPase activity                                    | 590 | 0.0720 | 1    | 2    |
| GO:0034290 | molecular function | holin activity                                                         | 591 | 0.3359 | 19   | 111  |
| GO:0035639 | molecular function | purine ribonucleoside triphosphate binding                             | 592 | 0.1223 | 944  | 4692 |
| GO:0036094 | molecular function | small molecule binding                                                 | 593 | 0.1200 | 1191 | 5881 |
| GO:0039660 | molecular function | structural constituent of virion                                       | 594 | 0.1043 | 4    | 13   |
| GO:0042083 | molecular function | 5,10-methylenetetrahydrofolate-dependent<br>methyltransferase activity | 595 | 0.1640 | 73   | 445  |
| GO:0042301 | molecular function | phosphate ion binding                                                  | 596 | 0.0340 | 1    | 15   |
| GO:0042624 | molecular function | ATPase activity, uncoupled                                             | 597 | 0.1204 | 36   | 104  |
| GO:0042802 | molecular function | identical protein binding                                              | 598 | 0.0750 | 5    | 29   |



|            |                    |                                                                                                                      |     |        |      |      |
|------------|--------------------|----------------------------------------------------------------------------------------------------------------------|-----|--------|------|------|
| GO:0043167 | molecular function | ion binding                                                                                                          | 599 | 0.1305 | 1409 | 7029 |
| GO:0043168 | molecular function | anion binding                                                                                                        | 600 | 0.1251 | 1032 | 5223 |
| GO:0043169 | molecular function | cation binding                                                                                                       | 601 | 0.1424 | 462  | 2122 |
| GO:0043177 | molecular function | organic acid binding                                                                                                 | 602 | 0.1067 | 29   | 113  |
| GO:0043364 | molecular function | catalysis of free radical formation                                                                                  | 603 | 0.2375 | 15   | 90   |
| GO:0043565 | molecular function | sequence-specific DNA binding                                                                                        | 604 | 0.1725 | 239  | 929  |
| GO:0044389 | molecular function | ubiquitin-like protein ligase binding                                                                                | 605 | 0.0110 | 1    | 3    |
| GO:0045156 | molecular function | electron transporter, transferring electrons within the cyclic electron transport pathway of photosynthesis activity | 606 | 0.1569 | 12   | 90   |
| GO:0046527 | molecular function | glucosyltransferase activity                                                                                         | 607 | 0.0980 | 1    | 9    |
| GO:0046812 | molecular function | host cell surface binding                                                                                            | 608 | 0.0572 | 14   | 53   |
| GO:0046872 | molecular function | metal ion binding                                                                                                    | 609 | 0.1426 | 461  | 2119 |
| GO:0046906 | molecular function | tetrapyrrole binding                                                                                                 | 610 | 0.1530 | 8    | 42   |
| GO:0046914 | molecular function | transition metal ion binding                                                                                         | 611 | 0.1534 | 192  | 969  |
| GO:0046982 | molecular function | protein heterodimerization activity                                                                                  | 612 | 0.0928 | 4    | 23   |
| GO:0046983 | molecular function | protein dimerization activity                                                                                        | 613 | 0.1159 | 47   | 185  |
| GO:0047429 | molecular function | nucleoside-triphosphate diphosphatase activity                                                                       | 614 | 0.1141 | 36   | 158  |
| GO:0048029 | molecular function | monosaccharide binding                                                                                               | 615 | 0.1060 | 28   | 110  |
| GO:0048037 | molecular function | cofactor binding                                                                                                     | 616 | 0.1725 | 162  | 840  |
| GO:0048256 | molecular function | flap endonuclease activity                                                                                           | 617 | 0.1190 | 10   | 26   |
| GO:0050145 | molecular function | nucleoside phosphate kinase activity                                                                                 | 618 | 0.1563 | 6    | 15   |
| GO:0050660 | molecular function | flavin adenine dinucleotide binding                                                                                  | 619 | 0.1544 | 44   | 311  |
| GO:0050661 | molecular function | NADP binding                                                                                                         | 619 | 0.1544 | 22   | 92   |
| GO:0050662 | molecular function | coenzyme binding                                                                                                     | 619 | 0.1544 | 121  | 646  |
| GO:0051287 | molecular function | NAD binding                                                                                                          | 619 | 0.1544 | 10   | 41   |
| GO:0050797 | molecular function | thymidylate synthase (FAD) activity                                                                                  | 620 | 0.1623 | 39   | 295  |

|            |                    |                                       |     |        |     |     |
|------------|--------------------|---------------------------------------|-----|--------|-----|-----|
| GO:0004799 | molecular function | thymidylate synthase activity         | 620 | 0.1623 | 34  | 150 |
| GO:0050897 | molecular function | cobalt ion binding                    | 621 | 0.1297 | 3   | 15  |
| GO:0051020 | molecular function | GTPase binding                        | 622 | 0.2020 | 1   | 2   |
| GO:0051082 | molecular function | unfolded protein binding              | 623 | 0.0603 | 4   | 11  |
| GO:0051213 | molecular function | dioxygenase activity                  | 624 | 0.2838 | 9   | 34  |
| GO:0051219 | molecular function | phosphoprotein binding                | 625 | 0.2510 | 1   | 4   |
| GO:0051537 | molecular function | 2 iron, 2 sulfur cluster binding      | 626 | 0.2886 | 5   | 17  |
| GO:0051539 | molecular function | 4 iron, 4 sulfur cluster binding      | 626 | 0.2886 | 16  | 92  |
| GO:0051540 | molecular function | metal cluster binding                 | 627 | 0.2456 | 32  | 150 |
| GO:0052689 | molecular function | carboxylic ester hydrolase activity   | 628 | 0.1823 | 10  | 40  |
| GO:0052796 | molecular function | exo-alpha-(2->8)-sialidase activity   | 629 | 0.1510 | 1   | 2   |
| GO:0052794 | molecular function | exo-alpha-(2->3)-sialidase activity   | 629 | 0.1510 | 1   | 2   |
| GO:0052795 | molecular function | exo-alpha-(2->6)-sialidase activity   | 629 | 0.1510 | 1   | 2   |
| GO:0060089 | molecular function | molecular transducer activity         | 630 | 0.1027 | 20  | 61  |
| GO:0060703 | molecular function | deoxyribonuclease inhibitor activity  | 631 | 0.3930 | 2   | 5   |
| GO:0061783 | molecular function | peptidoglycan muralytic activity      | 632 | 0.1621 | 115 | 777 |
| GO:0070001 | molecular function | aspartic-type peptidase activity      | 633 | 0.2353 | 6   | 16  |
| GO:0070279 | molecular function | vitamin B6 binding                    | 634 | 0.2035 | 4   | 30  |
| GO:0070403 | molecular function | NAD+ binding                          | 635 | 0.1720 | 6   | 26  |
| GO:0070548 | molecular function | L-glutamine aminotransferase activity | 636 | 0.1675 | 2   | 8   |
| GO:0070566 | molecular function | adenylyltransferase activity          | 637 | 0.1668 | 8   | 46  |
| GO:0070568 | molecular function | guanylyltransferase activity          | 638 | 0.1373 | 16  | 63  |
| GO:0070851 | molecular function | growth factor receptor binding        | 639 | 0.1736 | 2   | 5   |
| GO:0001664 | molecular function | G-protein coupled receptor binding    | 639 | 0.1736 | 4   | 11  |
| GO:0005125 | molecular function | cytokine activity                     | 639 | 0.1736 | 4   | 11  |
| GO:0005126 | molecular function | cytokine receptor binding             | 639 | 0.1736 | 4   | 11  |
| GO:0008083 | molecular function | growth factor activity                | 639 | 0.1736 | 7   | 22  |

|            |                    |                                               |     |        |      |       |
|------------|--------------------|-----------------------------------------------|-----|--------|------|-------|
| GO:0071949 | molecular function | FAD binding                                   | 640 | 0.2140 | 1    | 3     |
| GO:0097159 | molecular function | organic cyclic compound binding               | 641 | 0.1373 | 2999 | 14020 |
| GO:0097367 | molecular function | carbohydrate derivative binding               | 642 | 0.1237 | 988  | 4867  |
| GO:0098518 | molecular function | polynucleotide phosphatase activity           | 643 | 0.1861 | 8    | 29    |
| GO:0098772 | molecular function | molecular function regulator                  | 644 | 0.1284 | 26   | 102   |
| GO:0101005 | molecular function | ubiquitinyl hydrolase activity                | 645 | 0.2137 | 11   | 32    |
| GO:1901265 | molecular function | nucleoside phosphate binding                  | 646 | 0.1199 | 1148 | 5694  |
| GO:1901363 | molecular function | heterocyclic compound binding                 | 647 | 0.1373 | 2999 | 14020 |
| GO:1901505 | molecular function | carbohydrate derivative transporter activity  | 648 | 0.1658 | 9    | 32    |
| GO:1990817 | molecular function | RNA adenylyltransferase activity              | 649 | 0.1190 | 3    | 18    |
| GO:1990837 | molecular function | sequence-specific double-stranded DNA binding | 650 | 0.0612 | 14   | 71    |
| GO:0030983 | molecular function | mismatched DNA binding                        | 650 | 0.0612 | 3    | 7     |
